# Supplementary material
Source: MDPI journal article supplement (https://www.mdpi.com/2311-7524/9/4/515)
Supplement: s1 [file s1]

| GO category                      | Gene count | GO category                      | Gene count |
|----------------------------------|------------|----------------------------------|------------|
| <b>Known miRNAs</b>              |            | <b>Novel miRNAs</b>              |            |
| <b>cellular component</b>        |            | <b>cellular component</b>        |            |
| extracellular region             | 1          | extracellular region             | 67         |
| cell                             | 37         | cell                             | 368        |
| membrane                         | 5          | nucleoid                         | 1          |
| cell junction                    | 1          | membrane                         | 146        |
| macromolecular complex           | 1          | cell junction                    | 68         |
| organelle                        | 36         | extracellular matrix             | 3          |
| organelle part                   | 20         | membrane-enclosed lumen          | 20         |
| membrane part                    | 1          | macromolecular complex           | 52         |
| cell part                        | 37         | organelle                        | 342        |
|                                  |            | extracellular region part        | 6          |
| <b>molecular function</b>        |            | organelle part                   | 108        |
| nucleic acid binding             | 30         | membrane part                    | 43         |
| transcription factor activity    |            | cell part                        | 372        |
| catalytic activity               | 8          |                                  |            |
| transporter activity             | 1          | <b>molecular function</b>        |            |
| binding                          | 36         | nucleic acid binding             |            |
|                                  |            | transcription factor activity    | 39         |
| enzyme regulator activity        | 3          | catalytic activity               | 366        |
| <b>biological process</b>        |            | receptor activity                | 15         |
| reproduction                     | 29         | structural molecule activity     | 4          |
| immune system process            | 1          | transporter activity             | 15         |
| metabolic process                | 26         | binding                          | 241        |
| cellular process                 | 32         | electron carrier activity        | 7          |
| reproductive process             | 29         | antioxidant activity             | 1          |
| biological adhesion              | 4          | enzyme regulator activity        | 14         |
| signaling                        | 12         | molecular transducer activity    | 19         |
| multicellular organismal process | 19         |                                  |            |
| developmental process            | 33         | <b>biological process</b>        |            |
| growth                           | 19         | reproduction                     | 137        |
| rhythmic process                 | 4          | immune system process            | 49         |
| response to stimulus             | 21         | metabolic process                | 474        |
| localization                     | 9          | cell proliferation               | 7          |
| establishment of localization    | 3          | cellular process                 | 327        |
| multi-organism process           | 5          | viral reproduction               | 2          |
| biological regulation            | 37         | death                            | 13         |
| cellular component               | 28         | reproductive process             | 135        |
| organization or biogenesis       |            | biological adhesion              | 4          |
|                                  |            | signaling                        | 93         |
|                                  |            | multicellular organismal process | 151        |
|                                  |            | developmental process            | 199        |
|                                  |            | growth                           | 64         |

|                        |     |
|------------------------|-----|
| locomotion             | 2   |
| pigmentation           | 12  |
| rhythmic process       | 9   |
| response to stimulus   | 253 |
| localization           | 124 |
| establishment of       | 110 |
| localization           |     |
| multi-organism process | 91  |
| biological regulation  | 230 |
| cellular component     |     |
| organization or        | 195 |
| biogenesis             |     |

---
