# Supplementary material
Source: MDPI journal article supplement (https://www.mdpi.com/2311-7524/9/4/515)
Supplement: s1 [file s1]

**Table S4.** Predicted targets for identified candidate miRNAs

| <b>miRNA name</b> | <b>Target ID</b> | <b>Target annotation</b>                              |
|-------------------|------------------|-------------------------------------------------------|
| bol-miR157a       | Bo5g051980       | hypothetical protein CARUB_v10009364mg                |
| bol-miR157a       | Bo3g141480       | hypothetical protein CARUB_v10009364mg                |
| bol-miR157a       | Bo4g191350       | unnamed protein product                               |
| bol-miR157a       | Bo7g049940       | hypothetical protein CARUB_v10009364mg                |
| bol-miR157a       | Bo9g058970       | unnamed protein product                               |
| bol-miR157a       | Bo4g109710       | hypothetical protein ARALYDRAFT_486243                |
| bol-miR157a       | Bo4g015800       | unnamed protein product                               |
| bol-miR157a       | Bo7g049950       | hypothetical protein CARUB_v10009367mg                |
| bol-miR157a       | Bo7g065290       | unnamed protein product                               |
| bol-miR157a       | Bo8g050650       |                                                       |
| bol-miR157a       | Bo6g073290       | SQUAMOSA promoter binding protein-like protein 15     |
| bol-miR157a       | Bo9g097630       | SQUAMOSA promoter binding protein-like protein 13     |
| bol-miR157a       | Bo2g062840       | SQUAMOSA promoter binding protein-like protein 6      |
| bol-miR157a       | Bo5g051970       | unnamed protein product                               |
| bol-miR171a       | Bo4g104900       | protein LOST MERISTEM 2                               |
| bol-miR171a       | Bo9g001120       | LOST MERISTEMS family protein                         |
| bol-miR171a       | Bo7g009980       | hypothetical protein CARUB_v10013509mg                |
| bol-miR171a       | Bo6g074360       | hypothetical protein ARALYDRAFT_483651                |
| bol-miR171a       | Bo3g037600       | hypothetical protein CARUB_v10024743mg                |
| bol-miR172a       | Bo4g170600       | ATPDR3/PDR3                                           |
| bol-miR172a       | Bo8g087280       | AP2-like ethylene-responsive transcription factor SMZ |
| bol-miR172a       | Bo1g039140       | GTPase-activating protein REN1                        |
| bol-miR172a       | Bo7g118400       | APETALA2                                              |
| bol-miR172a       | Bo7g109630       | GTPase-activating protein REN1                        |
| bol-miR172a       | Bo9g084630       | hypothetical protein ARALYDRAFT_475539                |
| bol-miR172a       | Bo2g025090       | unnamed protein product                               |
| bol-miR172a       | Bo6g112640       | predicted protein                                     |
| bol-miR172a       | Bo7g064000       | hypothetical protein CARUB_v10026667mg                |
| bol-miR172a       | Bo9g141100       | unnamed protein product                               |
| bol-miR172a       | Bo4g025930       | hypothetical protein ARALYDRAFT_482998                |
| bol-miR172a       | Bo1g102330       | unnamed protein product                               |
| bol-miR172a       | Bo3g040110       | TARGET OF EARLY ACTIVATION TAGGED 1                   |
| bol-miR172a       | Bo4g070350       | hypothetical protein CARUB_v10025387mg                |
| bol-miR172a       | Bo1g004960       | unnamed protein product                               |
| bol-miR172b       | Bo7g118400       | APETALA2                                              |

---

|                |             |                                                       |
|----------------|-------------|-------------------------------------------------------|
| bol-miR172b    | Bo1g039140  | GTPase-activating protein REN1                        |
| bol-miR172b    | Bo4g170600  | ATPDR3/PDR3                                           |
| bol-miR172b    | Bo8g087280  | AP2-like ethylene-responsive transcription factor SMZ |
| bol-miR172b    | Bo9g084630  | hypothetical protein ARALYDRAFT_475539                |
| bol-miR172b    | Bo7g109630  | GTPase-activating protein REN1                        |
| bol-miR172b    | Bo7g064000  | hypothetical protein CARUB_v10026667mg                |
| bol-miR172b    | Bo9g141100  | unnamed protein product                               |
| bol-miR172b    | Bo1g102330  | unnamed protein product                               |
| bol-miR172b    | Bo4g025930  | hypothetical protein ARALYDRAFT_482998                |
| bol-miR172b    | Bo2g025090  | unnamed protein product                               |
| bol-miR172b    | Bo6g112640  | predicted protein                                     |
| bol-miR172b    | Bo4g070350  | hypothetical protein CARUB_v10025387mg                |
| bol-miR172b    | Bo1g004960  | unnamed protein product                               |
| bol-miR172b    | Bo3g040110  | TARGET OF EARLY ACTIVATION TAGGED 1                   |
| bol-miR398a-3p | Bo1g141310  | hypothetical protein CARUB_v10015153mg                |
| bol-miR398a-5p | Bo5G142430  | dnaj heat shock n-terminal domain-containing protein  |
| bol-miR824     | Bo6g080700  | MADs-box family protein                               |
| bol-miR824     | Bo7g116760  | hypothetical protein CARUB_v10017951mg                |
| bol-miR824     | Bo1g007520  | hypothetical protein CARUB_v10017951mg                |
| bol-miR0001-3p | Bo1g101470  | predicted protein                                     |
| bol-miR0001-3p | Bo5g003290  | probable beta-D-xylosidase 2                          |
| bol-miR0001-3p | Bo5g050750  | putative sterol-C-methyltransferase                   |
| bol-miR0001-3p | Bo02248s010 | 24-methylenesterol C-methyltransferase 2              |
| bol-miR0001-3p | Bo5g050740  | putative sterol-C-methyltransferase                   |
| bol-miR0004-5p | Bo4g122930  | hypothetical protein ARALYDRAFT_485670                |
| bol-miR0005-3p | Bo1g122960  | pentatricopeptide repeat-containing protein           |
| bol-miR0005-3p | Bo8g100420  | F3F9.12                                               |
| bol-miR0005-3p | Bo8g065910  | uncharacterized protein LOC101027242                  |
| bol-miR0005-3p | Bo9g174990  | putative formin-like protein 21a                      |

---

|                |            |                                            |
|----------------|------------|--------------------------------------------|
| bol-miR0005-3p | Bo8g059030 | unnamed protein product                    |
| bol-miR0005-3p | Bo4g197390 | N-myristoyl transferase                    |
| bol-miR0005-3p | Bo8g020580 | triacylglycerol lipase-like 1              |
| bol-miR0005-3p | Bo6g006870 | triacylglycerol lipase-like 1              |
| bol-miR0006-3p | Bo5g034810 | BTB/POZ domain-containing protein          |
| bol-miR0006-3p | Bo8g108410 | nitrate transporter                        |
| bol-miR0006-3p | Bo8g062590 | nitrate transporter                        |
| bol-miR0006-3p | Bo2g167760 | uncharacterized protein                    |
| bol-miR0006-3p | Bo6g077320 |                                            |
| bol-miR0006-3p | Bo5g017170 | nitrate transporter                        |
| bol-miR0006-3p | Bo8g108850 | At1g11580/T23J18_33                        |
| bol-miR0007-5p | Bo6g027930 | RNA-directed DNA polymerase-like protein   |
| bol-miR0009-3p | Bo6g042410 | ribosomal RNA apurinic site specific lyase |
| bol-miR0009-3p | Bo6g110890 | NHL repeat-containing protein              |
| bol-miR0009-3p | Bo5g039920 | hypothetical protein CARUB_v10008929mg     |
| bol-miR0009-3p | Bo4g157250 | uncharacterized protein                    |
| bol-miR0009-3p | Bo6g094760 | NHL repeat-containing protein              |
| bol-miR0014-3p | Bo9g181790 | predicted protein                          |
| bol-miR0014-3p | Bo4g024260 | structural constituent of nuclear pore     |
| bol-miR0014-3p | Bo4g188340 | hypothetical protein CARUB_v10023319mg     |
| bol-miR0014-3p | Bo1g005290 | hypothetical protein CARUB_v10005573mg     |
| bol-miR0014-3p | Bo5g131670 | hypothetical protein ARALYDRAFT_478830     |

---

|                |             |                                                        |
|----------------|-------------|--------------------------------------------------------|
| bol-miR0014-3p | Bo5g010300  | ATPUP16                                                |
| bol-miR0015-5p | Bo6g038320  | unknown protein                                        |
| bol-miR0015-5p | Bo4g103630  | microtubule-associated protein 4                       |
| bol-miR0015-5p | Bo3g044590  | HSP22                                                  |
| bol-miR0016-3p | Bo1g018030  | hypersensitive induced response protein 3, partial     |
| bol-miR0016-3p | Bo4g183040  | eIF4-gamma/eIF5/eIF2-epsilon domain-containing protein |
| bol-miR0016-3p | Bo4g182810  | hypothetical protein CARUB_v10011747mg                 |
| bol-miR0016-3p | Bo9g094240  | UDP-D-glucuronate 4-epimerase 5                        |
| bol-miR0016-3p | Bo1g022030  | protein PHLOEM protein 2-LIKE A2                       |
| bol-miR0017-5p | Bo5g007250  | mitochondrial editing factor 3                         |
| bol-miR0017-5p | Bo3g006940  | hypothetical protein ARALYDRAFT_487950                 |
| bol-miR0018-5p | Bo6g010460  | hypothetical protein ARALYDRAFT_891562                 |
| bol-miR0019-3p | Bo9g164020  | hypothetical protein ARALYDRAFT_488259                 |
| bol-miR0019-3p | Bo6g010880  | calcium-dependent lipid-binding family protein         |
| bol-miR0019-3p | Bo9g166040  | SET domain-containing protein                          |
| bol-miR0019-3p | Bo00958s080 | hypothetical protein ARALYDRAFT_488259                 |
| bol-miR0021-3p | Bo3g165560  | hypothetical protein CARUB_v10008066mg                 |
| bol-miR0021-3p | Bo5g037510  | hypothetical protein ARALYDRAFT_313119                 |
| bol-miR0021-3p | Bo6g066320  | SLL3 ORF2 protein                                      |
| bol-miR0021-3p | Bo7g119680  | HECT ubiquitin protein ligase family protein           |
| bol-miR0021-3p | Bo2g088810  | hypothetical protein 23.t00070                         |
| bol-miR0021-3p | Bo4g168110  | putative ligand-gated ion channel protein              |

---

|                |            |                                                              |
|----------------|------------|--------------------------------------------------------------|
| bol-miR0021-3p | Bo2g050720 | hydroxysteroid dehydrogenase 6                               |
| bol-miR0021-3p | Bo4g116850 | hypothetical protein CARUB_v10007453mg                       |
| bol-miR0021-3p | Bo4g156200 | protein kinase-like protein                                  |
| bol-miR0021-3p | Bo2g023770 | late embryogenesis abundant hydroxyproline-rich glycoprotein |
| bol-miR0022-5p | Bo6g030810 | hypothetical protein CARUB_v10010246mg                       |
| bol-miR0024-3p | Bo3g184890 | hypothetical protein ARALYDRAFT_314752                       |
| bol-miR0024-3p | Bo9g050990 | hypothetical protein 26.t00020                               |
| bol-miR0026-5p | Bo9g081970 | Zinc knuckle containing protein                              |
| bol-miR0026-5p | Bo2g159370 | uncharacterized protein                                      |
| bol-miR0026-5p | Bo5g111210 | ran GTPase binding protein                                   |
| bol-miR0026-5p | Bo6g099310 | hypothetical protein ARALYDRAFT_894101                       |
| bol-miR0026-5p | Bo4g070510 | ran GTPase binding protein                                   |
| bol-miR0026-5p | Bo2g055720 | calmodulin binding protein                                   |
| bol-miR0026-5p | Bo6g038300 | ran GTPase binding protein                                   |
| bol-miR0026-5p | Bo9g177570 | hypothetical protein CARUB_v10024547mg                       |
| bol-miR0026-5p | Bo7g033050 | hypothetical protein ARALYDRAFT_493781                       |
| bol-miR0026-5p | Bo3g048460 | ran GTPase binding protein                                   |
| bol-miR0027-5p | Bo8g075100 | Putative protein kinase                                      |
| bol-miR0028-3p | Bo3g018390 | putative disease resistance protein                          |
| bol-miR0028-3p | Bo4g177770 | F-box protein DOR                                            |
| bol-miR0028-3p | Bo7g107710 | putative disease resistance protein                          |
| bol-miR0028-3p | Bo3g044350 |                                                              |

---

|                |             |                                        |
|----------------|-------------|----------------------------------------|
| bol-miR0028-3p | Bo3g164040  | clubroot disease resistance protein    |
| bol-miR0028-3p | Bo7g107730  | putative disease resistance protein    |
| bol-miR0028-3p | Bo3g164030  | clubroot disease resistance protein    |
| bol-miR0030-3p | Bo5g115580  | hypothetical protein CARUB_v10013726mg |
| bol-miR0030-3p | Bo5g003390  | pectinesterase 7                       |
| bol-miR0030-3p | Bo2g010770  | putative kinase                        |
| bol-miR0030-3p | Bo1g017740  | hypothetical protein 23.t00003         |
| bol-miR0030-3p | Bo3g072010  | RNA-binding protein 47B                |
| bol-miR0033-5p | Bo6g094660  | ATTAP1                                 |
| bol-miR0034-5p | Bo5g070840  | hypothetical protein 27.t00126         |
| bol-miR0035-5p | Bo6g038320  | unknown protein                        |
| bol-miR0037-5p | Bo2g100330  | Ulp1 protease family protein           |
| bol-miR0037-5p | Bo7g103800  | Ulp1 protease family protein           |
| bol-miR0037-5p | Bo1g025460  | Ulp1 protease family protein           |
| bol-miR0037-5p | Bo7g115480  | hypothetical protein ARALYDRAFT_491547 |
| bol-miR0037-5p | Bo00578s050 | Ulp1 protease family protein           |
| bol-miR0037-5p | Bo3g127300  | Ulp1 protease family protein           |
| bol-miR0037-5p | Bo4g139830  | Ulp1 protease family protein           |
| bol-miR0037-5p | Bo6g081860  | Ulp1 protease family protein           |
| bol-miR0037-5p | Bo7g021680  | Ulp1 protease family protein           |
| bol-miR0037-5p | Bo3g101620  | Ulp1 protease family protein           |
| bol-miR0037-5p | Bo3g047170  | Ulp1 protease family protein           |

---

---

|                |            |                                           |
|----------------|------------|-------------------------------------------|
| bol-miR0037-5p | Bo9g151610 | Ulp1 protease family protein              |
| bol-miR0037-5p | Bo1g067410 | Ulp1 protease family protein              |
| bol-miR0037-5p | Bo4g140740 | Ulp1 protease family protein              |
| bol-miR0037-5p | Bo7g041010 | Ulp1 protease family protein              |
| bol-miR0037-5p | Bo1g093030 | S-locus linked 3 (SLL3) protein, putative |
| bol-miR0037-5p | Bo2g013950 | Ulp1 protease family protein              |
| bol-miR0037-5p | Bo2g146510 | Ulp1 protease family protein              |
| bol-miR0037-5p | Bo4g186330 | Ulp1 protease family protein              |
| bol-miR0037-5p | Bo2g083750 | Ulp1 protease family protein              |
| bol-miR0037-5p | Bo5g041490 | AMP-activated protein kinase-like protein |
| bol-miR0037-5p | Bo1g014520 | Ulp1 protease family protein              |
| bol-miR0037-5p | Bo3g114990 | Ulp1 protease family protein              |
| bol-miR0037-5p | Bo3g163900 | Ulp1 protease family protein              |
| bol-miR0037-5p | Bo6g064950 | Ulp1 protease family protein              |
| bol-miR0037-5p | Bo7g059760 | Ulp1 protease family protein              |
| bol-miR0037-5p | Bo1g087670 | Ulp1 protease family protein              |
| bol-miR0037-5p | Bo7g100540 | Ulp1 protease family protein              |
| bol-miR0037-5p | Bo3g019660 | Ulp1 protease family protein              |
| bol-miR0037-5p | Bo7g095770 | Ulp1 protease family protein              |
| bol-miR0037-5p | Bo4g126990 | Ulp1 protease family protein              |
| bol-miR0037-5p | Bo5g111120 | Ulp1 protease family protein              |
| bol-miR0037-5p | Bo5g148210 | Ulp1 protease family protein              |

---

---

|                |            |                              |
|----------------|------------|------------------------------|
| bol-miR0037-5p | Bo8g094800 | Ulp1 protease family protein |
| bol-miR0037-5p | Bo5g048870 | Ulp1 protease family protein |
| bol-miR0037-5p | Bo9g026040 | Ulp1 protease family protein |
| bol-miR0037-5p | Bo6g120400 | Ulp1 protease family protein |
| bol-miR0037-5p | Bo3g061000 | Ulp1 protease family protein |
| bol-miR0037-5p | Bo2g055740 | Ulp1 protease family protein |
| bol-miR0037-5p | Bo4g092530 | Ulp1 protease family protein |
| bol-miR0037-5p | Bo7g101080 | Ulp1 protease family protein |
| bol-miR0037-5p | Bo5g054570 | Ulp1 protease family protein |
| bol-miR0037-5p | Bo6g064930 | Ulp1 protease family protein |
| bol-miR0037-5p | Bo8g080640 | Ulp1 protease family protein |
| bol-miR0037-5p | Bo6g003260 | Ulp1 protease family protein |
| bol-miR0037-5p | Bo5g004540 | Ulp1 protease family protein |
| bol-miR0037-5p | Bo8g059300 | Ulp1 protease family protein |
| bol-miR0037-5p | Bo6g087530 | Ulp1 protease family protein |
| bol-miR0037-5p | Bo2g061340 | Ulp1 protease family protein |
| bol-miR0037-5p | Bo9g109810 | Ulp1 protease family protein |
| bol-miR0037-5p | Bo1g003140 | Ulp1 protease family protein |
| bol-miR0037-5p | Bo5g151550 | Ulp1 protease family protein |
| bol-miR0037-5p | Bo2g023570 | Ulp1 protease family protein |
| bol-miR0037-5p | Bo8g117800 | Ulp1 protease family protein |
| bol-miR0037-5p | Bo2g057590 | Ulp1 protease family protein |

---



---

|                |            |                                        |
|----------------|------------|----------------------------------------|
| bol-miR0037-5p | Bo7g075150 | Ulp1 protease family protein           |
| bol-miR0037-5p | Bo5g049030 | Ulp1 protease family protein           |
| bol-miR0037-5p | Bo9g015180 | Ulp1 protease family protein           |
| bol-miR0037-5p | Bo2g048130 | Ulp1 protease family protein           |
| bol-miR0037-5p | Bo2g126830 | Ulp1 protease family protein           |
| bol-miR0037-5p | Bo9g022440 | Ulp1 protease family protein           |
| bol-miR0037-5p | Bo8g054260 | Ulp1 protease family protein           |
| bol-miR0037-5p | Bo3g026930 | Ulp1 protease family protein           |
| bol-miR0037-5p | Bo4g139890 | Ulp1 protease family protein           |
| bol-miR0037-5p | Bo5g065850 | Ulp1 protease family protein           |
| bol-miR0037-5p | Bo4g117110 | hypothetical protein CARUB_v10018379mg |
| bol-miR0037-5p | Bo8g038010 | Ulp1 protease family protein           |
| bol-miR0037-5p | Bo3g091810 | Ulp1 protease family protein           |
| bol-miR0037-5p | Bo7g021160 | Ulp1 protease family protein           |
| bol-miR0037-5p | Bo1g016570 | Ulp1 protease family protein           |
| bol-miR0037-5p | Bo4g085060 | Ulp1 protease family protein           |
| bol-miR0037-5p | Bo6g033200 | Ulp1 protease family protein           |
| bol-miR0037-5p | Bo3g111190 | Ulp1 protease family protein           |
| bol-miR0037-5p | Bo9g022210 | Ulp1 protease family protein           |
| bol-miR0037-5p | Bo3g002730 | Ulp1 protease family protein           |
| bol-miR0037-5p | Bo8g077010 | Ulp1 protease family protein           |
| bol-miR0037-5p | Bo6g049380 | Ulp1 protease family protein           |

---

---

|                |            |                              |
|----------------|------------|------------------------------|
| bol-miR0037-5p | Bo8g081760 | Ulp1 protease family protein |
| bol-miR0037-5p | Bo3g175140 | Ulp1 protease family protein |
| bol-miR0037-5p | Bo6g029460 | Ulp1 protease family protein |
| bol-miR0037-5p | Bo1g005050 | Ulp1 protease family protein |
| bol-miR0037-5p | Bo4g195340 | Ulp1 protease family protein |
| bol-miR0037-5p | Bo9g165790 | Ulp1 protease family protein |
| bol-miR0037-5p | Bo9g171540 | Ulp1 protease family protein |
| bol-miR0037-5p | Bo1g030720 | Ulp1 protease family protein |
| bol-miR0037-5p | Bo9g166420 | Ulp1 protease family protein |
| bol-miR0037-5p | Bo1g057680 | Ulp1 protease family protein |
| bol-miR0037-5p | Bo7g092710 | Ulp1 protease family protein |
| bol-miR0037-5p | Bo3g083320 | disease resistance protein   |
| bol-miR0037-5p | Bo3g081260 | Ulp1 protease family protein |
| bol-miR0037-5p | Bo3g027280 | Ulp1 protease family protein |
| bol-miR0037-5p | Bo8g076380 | Ulp1 protease family protein |
| bol-miR0037-5p | Bo6g100960 | Os05g0491100                 |
| bol-miR0037-5p | Bo3g185150 | Ulp1 protease family protein |
| bol-miR0037-5p | Bo1g039690 | Ulp1 protease family protein |
| bol-miR0037-5p | Bo4g026810 | Ulp1 protease family protein |
| bol-miR0037-5p | Bo8g048290 | Ulp1 protease family protein |
| bol-miR0037-5p | Bo3g164380 | Ulp1 protease family protein |
| bol-miR0037-5p | Bo4g184640 | Ulp1 protease family protein |

---

---

|                |             |                                                 |
|----------------|-------------|-------------------------------------------------|
| bol-miR0037-5p | Bo7g009840  | Ulp1 protease family protein                    |
| bol-miR0037-5p | Bo8g067370  | Ulp1 protease family protein                    |
| bol-miR0037-5p | Bo2g055430  | Ulp1 protease family protein                    |
| bol-miR0037-5p | Bo1g029620  | Ulp1 protease family protein                    |
| bol-miR0037-5p | Bo9g133440  | Ulp1 protease family protein                    |
| bol-miR0037-5p | Bo5g010660  | Ulp1 protease family protein                    |
| bol-miR0037-5p | Bo6g046530  | Ulp1 protease family protein                    |
| bol-miR0037-5p | Bo3g099380  | predicted protein                               |
| bol-miR0037-5p | Bo8g065180  | Ulp1 protease family protein                    |
| bol-miR0037-5p | Bo1g057000  | Ulp1 protease family protein                    |
| bol-miR0037-5p | Bo2g102070  | Ulp1 protease family protein                    |
| bol-miR0037-5p | Bo2g138840  | hypothetical protein CARUB_v10017413mg, partial |
| bol-miR0037-5p | Bo8g016910  | Ulp1 protease family protein                    |
| bol-miR0037-5p | Bo5g062440  | Ulp1 protease family protein                    |
| bol-miR0037-5p | Bo8g065190  | Ulp1 protease family protein                    |
| bol-miR0037-5p | Bo5g155170  | Ulp1 protease family protein                    |
| bol-miR0037-5p | Bo00805s010 | Ulp1 protease family protein                    |
| bol-miR0037-5p | Bo9g022370  | Ulp1 protease family protein                    |
| bol-miR0037-5p | Bo8g047200  | Ulp1 protease family protein                    |
| bol-miR0037-5p | Bo7g030540  | Ulp1 protease family protein                    |
| bol-miR0037-5p | Bo2g009230  | Ulp1 protease family protein                    |
| bol-miR0037-5p | Bo3g045730  | Ulp1 protease family protein                    |

---

---

|                |             |                                          |
|----------------|-------------|------------------------------------------|
| bol-miR0037-5p | Bo3g113410  | Ulp1 protease family protein             |
| bol-miR0037-5p | Bo1g007310  | Ulp1 protease family protein             |
| bol-miR0037-5p | Bo8g052760  | Ulp1 protease family protein             |
| bol-miR0037-5p | Bo8g068040  | Ulp1 protease family protein             |
| bol-miR0037-5p | Bo6g092920  | Ulp1 protease family protein             |
| bol-miR0037-5p | Bo4g004700  | long chain acyl-CoA synthetase 1         |
| bol-miR0037-5p | Bo1g037350  | Ulp1 protease family protein             |
| bol-miR0037-5p | Bo4g137170  | Ulp1 protease family protein             |
| bol-miR0037-5p | Bo9g090710  | Ulp1 protease family protein             |
| bol-miR0037-5p | Bo4g084970  | Ulp1 protease family protein             |
| bol-miR0037-5p | Bo5g064440  | Ulp1 protease family protein             |
| bol-miR0037-5p | Bo4g024210  | Ulp1 protease family protein             |
| bol-miR0037-5p | Bo1g101550  | Ulp1 protease family protein             |
| bol-miR0037-5p | Bo00579s160 | Ulp1 protease family protein             |
| bol-miR0037-5p | Bo3g045680  | Ulp1 protease family protein             |
| bol-miR0037-5p | Bo2g013460  | Ulp1 protease family protein             |
| bol-miR0037-5p | Bo9g023780  | Ulp1 protease family protein             |
| bol-miR0037-5p | Bo5g105040  | Ulp1 protease family protein             |
| bol-miR0037-5p | Bo4g045740  | Ulp1 protease family protein             |
| bol-miR0037-5p | Bo7g031020  | Ulp1 protease family protein             |
| bol-miR0037-5p | Bo3g159910  | chaperone DnaJ-domain containing protein |
| bol-miR0037-5p | Bo8g110870  | Ulp1 protease family protein             |

---

---

|                |            |                              |
|----------------|------------|------------------------------|
| bol-miR0037-5p | Bo6g064610 | Ulp1 protease family protein |
| bol-miR0037-5p | Bo4g173770 | Ulp1 protease family protein |
| bol-miR0037-5p | Bo1g138730 | Ulp1 protease family protein |
| bol-miR0037-5p | Bo7g088800 | Ulp1 protease family protein |
| bol-miR0037-5p | Bo7g067510 | Ulp1 protease family protein |
| bol-miR0037-5p | Bo5g023490 | Ulp1 protease family protein |
| bol-miR0037-5p | Bo7g098810 | Ulp1 protease family protein |
| bol-miR0037-5p | Bo8g070400 | Ulp1 protease family protein |
| bol-miR0037-5p | Bo3g060540 | Ulp1 protease family protein |
| bol-miR0037-5p | Bo8g089850 | Ulp1 protease family protein |
| bol-miR0037-5p | Bo8g076690 | Ulp1 protease family protein |
| bol-miR0037-5p | Bo4g074150 | Ulp1 protease family protein |
| bol-miR0037-5p | Bo9g073140 | Ulp1 protease family protein |
| bol-miR0037-5p | Bo4g158650 | Ulp1 protease family protein |
| bol-miR0037-5p | Bo1g076880 | Ulp1 protease family protein |
| bol-miR0037-5p | Bo8g021760 | Ulp1 protease family protein |
| bol-miR0037-5p | Bo1g105220 | Ulp1 protease family protein |
| bol-miR0037-5p | Bo8g117850 | Ulp1 protease family protein |
| bol-miR0037-5p | Bo9g064110 | Ulp1 protease family protein |
| bol-miR0037-5p | Bo4g151610 | Ulp1 protease family protein |
| bol-miR0037-5p | Bo2g145000 | Ulp1 protease family protein |
| bol-miR0037-5p | Bo1g047880 | Ulp1 protease family protein |

---

|                |             |                                                 |
|----------------|-------------|-------------------------------------------------|
| bol-miR0037-5p | Bo2g124390  | Ulp1 protease family protein                    |
| bol-miR0037-5p | Bo2g149260  | Ulp1 protease family protein                    |
| bol-miR0037-5p | Bo4g061520  | Ulp1 protease family protein                    |
| bol-miR0037-5p | Bo00737s040 | Ulp1 protease family protein                    |
| bol-miR0037-5p | Bo6g083640  | Ulp1 protease family protein                    |
| bol-miR0037-5p | Bo9g152010  | Ulp1 protease family protein                    |
| bol-miR0037-5p | Bo4g152950  | Ulp1 protease family protein                    |
| bol-miR0037-5p | Bo2g109290  | Ulp1 protease family protein                    |
| bol-miR0037-5p | Bo9g117450  | Ulp1 protease family protein                    |
| bol-miR0038-3p | Bo4g175910  | hypothetical protein CARUB_v10023243mg, partial |
| bol-miR0038-3p | Bo4g052600  | hypothetical protein ARALYDRAFT_482041          |
| bol-miR0039-5p | Bo6g038320  | unknown protein                                 |
| bol-miR0040-5p | Bo6g062200  | hypothetical protein ARALYDRAFT_494037          |
| bol-miR0043-3p | Bo9g032400  | hypothetical protein CARUB_v10020449mg, partial |
| bol-miR0043-3p | Bo5g012230  | P-glycoprotein 10                               |
| bol-miR0043-3p | Bo8g109350  | transducin/WD-40 repeat-containing protein      |
| bol-miR0045-3p | Bo5g145470  | pentatricopeptide repeat-containing protein     |
| bol-miR0046-3p | Bo7g064250  | hypothetical protein ARALYDRAFT_496904          |
| bol-miR0046-3p | Bo4g151370  | receptor like protein 32                        |
| bol-miR0046-3p | Bo3g032480  | hypothetical protein ARALYDRAFT_345626          |
| bol-miR0046-3p | Bo2g082270  | hypothetical protein ARALYDRAFT_476602          |
| bol-miR0046-3p | Bo2g051400  | glycosyl hydrolase 9A2                          |

|                |            |                                                               |
|----------------|------------|---------------------------------------------------------------|
| bol-miR0046-3p | Bo7g010040 | predicted protein                                             |
| bol-miR0046-3p | Bo9g018180 | zinc knuckle containing protein                               |
| bol-miR0046-3p | Bo4g076920 | C2H2-type zinc finger family protein                          |
| bol-miR0046-3p | Bo3g120910 | hypothetical protein                                          |
| bol-miR0046-3p | Bo6g062110 | unnamed protein product                                       |
| bol-miR0046-3p | Bo9g176650 | mitochondrial glycoprotein family protein                     |
| bol-miR0046-3p | Bo3g048470 | kinase family protein                                         |
| bol-miR0046-3p | Bo9g020490 | hypothetical protein ARALYDRAFT_496904                        |
| bol-miR0046-3p | Bo3g021500 | protein translocase                                           |
| bol-miR0046-3p | Bo1g060490 | hypothetical protein CARUB_v10016641mg                        |
| bol-miR0047-5p | Bo5g003710 | F-box protein DOR                                             |
| bol-miR0047-5p | Bo4g178000 | F-box protein DOR                                             |
| bol-miR0047-5p | Bo6g043650 | hypothetical protein ARALYDRAFT_890118                        |
| bol-miR0048-5p | Bo9g017520 | DEAD-box ATP-dependent RNA helicase 30                        |
| bol-miR0048-5p | Bo9g116220 |                                                               |
| bol-miR0048-5p | Bo3g035730 |                                                               |
| bol-miR0048-5p | Bo2g044610 | RecName: Full=Putative FBD-associated F-box protein At5g53640 |
| bol-miR0048-5p | Bo8g076280 | RecName: Full=Putative FBD-associated F-box protein At5g53640 |
| bol-miR0049-3p | Bo9g008030 | hypothetical protein CARUB_v10016795mg                        |
| bol-miR0049-3p | Bo1g008340 | pentatricopeptide repeat-containing protein                   |
| bol-miR0049-3p | Bo5g145550 | mitochondrial editing factor 19                               |
| bol-miR0049-3p | Bo5g009550 | pentatricopeptide repeat-containing protein                   |

|                |            |                                             |
|----------------|------------|---------------------------------------------|
| bol-miR0049-3p | Bo6g121140 | hypothetical protein CARUB_v10021396mg      |
| bol-miR0049-3p | Bo4g130840 | pentatricopeptide repeat-containing protein |
| bol-miR0049-3p | Bo4g031250 | pentatricopeptide repeat-containing protein |
| bol-miR0049-3p | Bo4g083560 | hypothetical protein CARUB_v10022184mg      |
| bol-miR0049-3p | Bo1g019980 | hypothetical protein CARUB_v10004552mg      |
| bol-miR0049-3p | Bo3g097970 | pentatricopeptide repeat-containing protein |
| bol-miR0049-3p | Bo5g116930 | hypothetical protein CARUB_v10013125mg      |
| bol-miR0049-3p | Bo4g039070 | pentatricopeptide repeat-containing protein |
| bol-miR0049-3p | Bo6g083500 | pentatricopeptide repeat-containing protein |
| bol-miR0049-3p | Bo6g064460 | hypothetical protein CARUB_v10004394mg      |
| bol-miR0049-3p | Bo5g039610 | pentatricopeptide repeat-containing protein |
| bol-miR0049-3p | Bo6g052620 | predicted protein                           |
| bol-miR0049-3p | Bo8g058270 | pentatricopeptide repeat-containing protein |
| bol-miR0049-3p | Bo5g116800 | pentatricopeptide repeat-containing protein |
| bol-miR0049-3p | Bo7g075380 | pentatricopeptide repeat-containing protein |
| bol-miR0049-3p | Bo8g081670 | pentatricopeptide repeat-containing protein |
| bol-miR0049-3p | Bo5g049070 | pentatricopeptide repeat-containing protein |
| bol-miR0051-3p | Bo7g022980 | hypothetical protein BrnapMp028             |
| bol-miR0051-3p | Bo4g092600 | aspartic proteinase A2                      |
| bol-miR0051-3p | Bo8g108560 | aspartic protease                           |
| bol-miR0051-3p | Bo9g027870 | copia LTR rider                             |
| bol-miR0051-3p | Bo8g061450 | unnamed protein product                     |



|                |             |                                                             |
|----------------|-------------|-------------------------------------------------------------|
| bol-miR0054-3p | Bo5g095830  | hypothetical protein VITISV_002640                          |
| bol-miR0056-5p | Bo3g090240  | purple acid phosphatase 10                                  |
| bol-miR0056-5p | Bo9g024050  | purple acid phosphatase 10                                  |
| bol-miR0056-5p | Bo9g054420  | hypothetical protein ARALYDRAFT_314946                      |
| bol-miR0056-5p | Bo3g091330  | hypothetical protein CARUB_v10013635mg                      |
| bol-miR0057-3p | Bo3g107420  | hypothetical protein ARALYDRAFT_337115                      |
| bol-miR0057-3p | Bo9g021520  | hypothetical protein 27.t00109                              |
| bol-miR0057-3p | Bo9g097290  | pyridine nucleotide-disulfide oxidoreductase family protein |
| bol-miR0058-3p | Bo4g104990  | hypothetical protein ARALYDRAFT_907564                      |
| bol-miR0059-5p | Bo9g154310  | hypothetical protein ARALYDRAFT_488789                      |
| bol-miR0060-5p | Bo8g115720  | hypothetical protein ARALYDRAFT_887579                      |
| bol-miR0060-5p | Bo5g132790  | Putative retroelement polyprotein                           |
| bol-miR0061-3p | Bo1g053450  | hypothetical protein CARUB_v10004093mg                      |
| bol-miR0061-3p | Bo2g150130  | disease resistance protein                                  |
| bol-miR0061-3p | Bo9g010660  | hypothetical protein ARALYDRAFT_333307                      |
| bol-miR0063-3p | Bo9g045420  |                                                             |
| bol-miR0064-3p | Bo04334s010 | hypothetical protein 23.t00055                              |
| bol-miR0064-3p | Bo5g021070  | hypothetical protein 23.t00055                              |
| bol-miR0064-3p | Bo2g037800  | hypothetical protein 23.t00055                              |
| bol-miR0064-3p | Bo9g156010  | hypothetical protein 23.t00055                              |
| bol-miR0064-3p | Bo1g102130  | putative E3 ubiquitin-protein ligase XBAT35                 |
| bol-miR0064-3p | Bo9g140990  | hypothetical protein 23.t00055                              |

---

|                |             |                                |
|----------------|-------------|--------------------------------|
| bol-miR0064-3p | Bo3g065630  | hypothetical protein 23.t00055 |
| bol-miR0064-3p | Bo5g072520  | hypothetical protein 23.t00055 |
| bol-miR0064-3p | Bo4g148380  | hypothetical protein 23.t00055 |
| bol-miR0064-3p | Bo2g055890  | hypothetical protein 23.t00055 |
| bol-miR0064-3p | Bo9g169980  | hypothetical protein 23.t00055 |
| bol-miR0064-3p | Bo7g097280  | hypothetical protein 23.t00055 |
| bol-miR0064-3p | Bo9g120800  | hypothetical protein 23.t00055 |
| bol-miR0064-3p | Bo4g041240  | hypothetical protein 23.t00055 |
| bol-miR0064-3p | Bo1g101120  | hypothetical protein 23.t00055 |
| bol-miR0064-3p | Bo1g097870  | hypothetical protein 23.t00055 |
| bol-miR0064-3p | Bo1g051440  | hypothetical protein 23.t00055 |
| bol-miR0064-3p | Bo5g041650  | hypothetical protein 23.t00055 |
| bol-miR0064-3p | Bo5g117230  | hypothetical protein 23.t00055 |
| bol-miR0064-3p | Bo9g160290  | hypothetical protein 23.t00055 |
| bol-miR0064-3p | Bo3g100560  | hypothetical protein 23.t00055 |
| bol-miR0064-3p | Bo9g022330  | hypothetical protein 23.t00055 |
| bol-miR0064-3p | Bo1g138370  | hypothetical protein 23.t00055 |
| bol-miR0064-3p | Bo4g136130  | hypothetical protein 23.t00055 |
| bol-miR0064-3p | Bo01359s020 | hypothetical protein 23.t00055 |
| bol-miR0064-3p | Bo7g003830  | hypothetical protein 23.t00055 |
| bol-miR0064-3p | Bo1g091550  | hypothetical protein 23.t00055 |
| bol-miR0064-3p | Bo1g124770  | hypothetical protein 23.t00055 |

---

|                |             |                                                               |
|----------------|-------------|---------------------------------------------------------------|
| bol-miR0064-3p | Bo1g051620  | hypothetical protein 23.t00055                                |
| bol-miR0064-3p | Bo05307s010 | hypothetical protein 23.t00055                                |
| bol-miR0064-3p | Bo3g109500  | hypothetical protein 23.t00055                                |
| bol-miR0066-5p | Bo3g054920  | hypothetical protein CARUB_v10016062mg                        |
| bol-miR0067-5p | Bo4g191110  | predicted protein                                             |
| bol-miR0068-3p | Bo4g194300  | RNA-binding (RRM/RBD/RNP motifs) family protein               |
| bol-miR0068-3p | Bo4g105080  | uncharacterized protein                                       |
| bol-miR0069-3p | Bo3g029940  | predicted protein                                             |
| bol-miR0069-3p | Bo3g029920  | glycine-rich protein                                          |
| bol-miR0070-3p | Bo5g126520  | MAR-binding filament-like protein 1                           |
| bol-miR0070-5p | Bo6g081980  | auxin response factor 17-1                                    |
| bol-miR0071-3p | Bo4g018440  | pentatricopeptide repeat-containing protein                   |
| bol-miR0072-5p | Bo6g018790  | F-box protein                                                 |
| bol-miR0072-5p | Bo3g010660  | predicted protein                                             |
| bol-miR0072-5p | Bo8g101650  | hypothetical protein CARUB_v10025632mg                        |
| bol-miR0072-5p | Bo8g107530  | F-box and associated interaction domains-containing protein   |
| bol-miR0072-5p | Bo4g154240  | hypothetical protein CARUB_v10025534mg                        |
| bol-miR0072-5p | Bo4g019750  | hypothetical protein CARUB_v10025707mg                        |
| bol-miR0072-5p | Bo4g145460  | predicted protein                                             |
| bol-miR0072-5p | Bo4g052290  | G-type lectin S-receptor-like serine/threonine-protein kinase |
| bol-miR0072-5p | Bo8g065280  | F-box and associated interaction domains-containing protein   |
| bol-miR0072-5p | Bo3g034370  | hypothetical protein CARUB_v10023563mg                        |

|                |            |                                                 |
|----------------|------------|-------------------------------------------------|
| bol-miR0072-5p | Bo9g009420 | hypothetical protein CARUB_v10026179mg          |
| bol-miR0072-5p | Bo3g034920 | predicted protein                               |
| bol-miR0072-5p | Bo7g065740 | pentatricopeptide repeat-containing protein     |
| bol-miR0072-5p | Bo6g018750 | hypothetical protein ARALYDRAFT_474131          |
| bol-miR0072-5p | Bo5g009530 | F-box/kelch-repeat protein                      |
| bol-miR0072-5p | Bo4g179460 | predicted protein                               |
| bol-miR0072-5p | Bo6g123730 | evolutionarily conserved C-terminal region 8    |
| bol-miR0072-5p | Bo2g054020 | receptor serine/threonine kinase PR5K, putative |
| bol-miR0074-3p | Bo1g025900 | hypothetical protein CARUB_v10004543mg          |
| bol-miR0075-5p | Bo3g107020 | Rac-like GTP-binding protein ARAC10             |
| bol-miR0075-5p | Bo6g082220 | hypothetical protein CARUB_v10006622mg, partial |
| bol-miR0075-5p | Bo4g039530 | baby boom interacting protein 1B                |
| bol-miR0075-5p | Bo7g078790 | hypothetical protein CARUB_v10016649mg          |
| bol-miR0075-5p | Bo5g022310 | hypothetical protein CARUB_v10008595mg          |
| bol-miR0075-5p | Bo9g015230 | Rac-like GTP-binding protein ARAC10             |
| bol-miR0075-5p | Bo2g165370 | Rac-like GTP-binding protein ARAC10             |
| bol-miR0075-5p | Bo5g019970 | hypothetical protein CARUB_v10008407mg          |
| bol-miR0076-5p | Bo7g080990 | aspartyl protease family protein                |
| bol-miR0076-5p | Bo9g072970 | aspartyl protease family protein                |
| bol-miR0076-5p | Bo4g019630 | PREDICTED: extensin-2-like                      |
| bol-miR0077-5p | Bo4g034830 | hypothetical protein CARUB_v10007908mg          |
| bol-miR0080-5p | Bo3g005430 |                                                 |

|                |             |                                                                     |
|----------------|-------------|---------------------------------------------------------------------|
| bol-miR0080-5p | Bo00615s250 | hypothetical protein ARALYDRAFT_919840                              |
| bol-miR0082-3p | Bo2g158820  | hypothetical protein CARUB_v10012960mg                              |
| bol-miR0082-3p | Bo3g083740  | Helicase/SANT-associated, DNA binding protein                       |
| bol-miR0082-3p | Bo7g018690  | hypothetical protein ARALYDRAFT_480799                              |
| bol-miR0082-3p | Bo4g178060  | hypothetical protein CARUB_v10013651mg                              |
| bol-miR0082-3p | Bo1g012030  | retroelement pol polyprotein-like                                   |
| bol-miR0082-3p | Bo1g143930  | F-box and associated interaction domains-containing protein         |
| bol-miR0082-3p | Bo7g045340  | hypothetical protein PRUPE_ppa006987mg                              |
| bol-miR0082-3p | Bo3g090170  | hypothetical protein ARALYDRAFT_480799                              |
| bol-miR0085-3p | Bo8g101920  | Basic-leucine zipper (bZIP) transcription factor family protein     |
| bol-miR0085-3p | Bo3g149620  | Basic-leucine zipper (bZIP) transcription factor family protein     |
| bol-miR0085-3p | Bo4g145800  | hypothetical protein ARALYDRAFT_480978                              |
| bol-miR0085-3p | Bo1g022510  | FAD-binding domain-containing protein                               |
| bol-miR0085-3p | Bo2g100290  | hypothetical protein CARUB_v10000612mg                              |
| bol-miR0085-3p | Bo7g119550  | Basic-leucine zipper (bZIP) transcription factor family protein     |
| bol-miR0085-3p | Bo1g022520  | FAD-binding domain-containing protein                               |
| bol-miR0088-3p | Bo9g113980  | calcium-binding endonuclease/exonuclease/phosphatase family protein |
| bol-miR0089-5p | Bo1g011640  | kinase                                                              |
| bol-miR0090-3p | Bo2g155100  | Frigida-like protein                                                |
| bol-miR0090-3p | Bo6g110620  | unknown protein; 6859-4829                                          |
| bol-miR0091-3p | Bo1g139560  | hypothetical protein CARUB_v10014171mg                              |
| bol-miR0092-5p | Bo6g026500  | hypothetical protein 27.t00123                                      |

|                |             |                                                          |
|----------------|-------------|----------------------------------------------------------|
| bol-miR0092-5p | Bo1g138450  | hypothetical protein CARUB_v10013820mg                   |
| bol-miR0095-3p | Bo9g001090  | transducin/WD40 domain-containing protein                |
| bol-miR0095-3p | Bo9g008920  | hypothetical protein CARUB_v10019495mg                   |
| bol-miR0097-3p | Bo18546s010 | retrotransposon protein, putative, Ty3-gypsy sub-class   |
| bol-miR0097-5p | Bo1g012030  | retroelement pol polyprotein-like                        |
| bol-miR0099-5p | Bo7g081290  |                                                          |
| bol-miR0099-5p | Bo5g070780  | hypothetical protein FOC1_g10000743                      |
| bol-miR0099-5p | Bo5g004130  | hypothetical protein PHACADRAFT_214654                   |
| bol-miR0099-5p | Bo9g176620  | hypothetical protein ARALYDRAFT_487407                   |
| bol-miR0099-5p | Bo1g109060  |                                                          |
| bol-miR0099-5p | Bo4g025900  | hypothetical protein AGABI1DRAFT_116475                  |
| bol-miR0099-5p | Bo9g102330  | hypothetical protein CARUB_v10008573mg                   |
| bol-miR0099-5p | Bo6g114430  | hypothetical protein CARUB_v10008573mg                   |
| bol-miR0099-5p | Bo2g095870  | hypothetical protein SETTUDRAFT_38572                    |
| bol-miR0099-5p | Bo5g098190  | predicted protein                                        |
| bol-miR0099-5p | Bo2g009890  | haloacid dehalogenase-like hydrolase superfamily protein |
| bol-miR0099-5p | Bo4g136620  | hypothetical protein EMIHUDRAFT_437900, partial          |
| bol-miR0099-5p | Bo5g030270  | AT3g60750/T4C21_160                                      |
| bol-miR0099-5p | Bo3g127210  | unknown protein                                          |
| bol-miR0099-5p | Bo4g149780  | predicted protein                                        |
| bol-miR0099-5p | Bo7g081310  |                                                          |
| bol-miR0099-5p | Bo3g115070  | hypothetical protein THITE_2120977                       |

---

|                |             |                                                                    |
|----------------|-------------|--------------------------------------------------------------------|
| bol-miR0099-5p | Bo4g187010  | hypothetical protein CARUB_v10008573mg                             |
| bol-miR0099-5p | Bo2g028210  | hypothetical protein CARUB_v10021549mg                             |
| bol-miR0099-5p | Bo5g038640  | hypothetical protein SETTUDRAFT_38572                              |
| bol-miR0100-5p | Bo4g115330  | putative protein                                                   |
| bol-miR0100-5p | Bo5g005750  | callose synthase 1                                                 |
| bol-miR0100-5p | Bo20888s010 | hypothetical protein CARUB_v10013313mg                             |
| bol-miR0100-5p | Bo4g055080  | Ulp1 protease family protein                                       |
| bol-miR0101-5p | Bo2g167570  | beta-hydroxyisobutyryl-CoA hydrolase 1                             |
| bol-miR0102-3p | Bo4g139940  | uncharacterized protein                                            |
| bol-miR0103-3p | Bo5g123690  | hypothetical protein ARALYDRAFT_897998                             |
| bol-miR0103-3p | Bo6g077030  | hypothetical protein ARALYDRAFT_486519                             |
| bol-miR0103-3p | Bo1g010950  |                                                                    |
| bol-miR0103-3p | Bo8g095200  | hypothetical protein ARALYDRAFT_486519                             |
| bol-miR0105-5p | Bo3g004890  | alpha-galactosidase 1                                              |
| bol-miR0105-5p | Bo3g054520  | glycosyl transferase family 1 protein                              |
| bol-miR0105-5p | Bo4g145390  | hypothetical protein ARALYDRAFT_471407                             |
| bol-miR0105-5p | Bo2g093340  | hypothetical protein ARALYDRAFT_359220                             |
| bol-miR0106-3p | Bo4g098510  | hypothetical protein ARALYDRAFT_486780                             |
| bol-miR0107-3p | Bo3g057160  | putative inactive leucine-rich repeat receptor-like protein kinase |
| bol-miR0107-3p | Bo5g148730  | hypothetical protein ARALYDRAFT_477625                             |
| bol-miR0108-3p | Bo3g020980  | F-box family protein                                               |
| bol-miR0108-3p | Bo9g008630  | uncharacterized protein                                            |

---

|                |             |                                                    |
|----------------|-------------|----------------------------------------------------|
| bol-miR0108-3p | Bo8g059640  | uncharacterized protein                            |
| bol-miR0110-3p | Bo3g178380  | hypothetical protein ARALYDRAFT_474153             |
| bol-miR0110-3p | Bo2g070790  | glycosyltransferase family 14 protein              |
| bol-miR0110-3p | Bo5g137830  | hypothetical protein CARUB_v10014233mg             |
| bol-miR0110-3p | Bo5g003680  | hypothetical protein CARUB_v10009900mg             |
| bol-miR0110-3p | Bo2g011740  | MF14                                               |
| bol-miR0110-3p | Bo6g112700  | glycosyltransferase family 14 protein              |
| bol-miR0111-5p | Bo5g132650  | hypothetical protein ARALYDRAFT_341449             |
| bol-miR0112-5p | Bo5g122760  | hypothetical protein ARALYDRAFT_479252             |
| bol-miR0113-3p | Bo6g081210  | unnamed protein product                            |
| bol-miR0114-3p | Bo4g069270  | hypothetical protein CARUB_v10015074mg             |
| bol-miR0114-3p | Bo2g104760  | hypothetical protein CARUB_v10015074mg             |
| bol-miR0114-3p | Bo6g014470  | hypothetical protein CARUB_v10016331mg             |
| bol-miR0115-3p | Bo00576s070 | hypothetical protein ARALYDRAFT_485726             |
| bol-miR0115-3p | Bo3g149300  | hypothetical protein CARUB_v10004186mg             |
| bol-miR0115-3p | Bo5g065870  | hypothetical protein ARALYDRAFT_473645             |
| bol-miR0116-5p | Bo9g172080  | PREDICTED: uncharacterized protein LOC100853570    |
| bol-miR0116-5p | Bo2g155810  | myrosinase                                         |
| bol-miR0121-3p | Bo2g155880  | putative retroelement pol polyprotein-like protein |
| bol-miR0121-3p | Bo8g050770  | putative retroelement pol polyprotein-like protein |
| bol-miR0121-3p | Bo3g068230  | putative retroelement pol polyprotein-like protein |
| bol-miR0121-3p | Bo4g166670  | putative retroelement pol polyprotein-like protein |



---

|                |             |                                                    |
|----------------|-------------|----------------------------------------------------|
| bol-miR0121-3p | Bo3g184340  | putative retroelement pol polyprotein-like protein |
| bol-miR0121-3p | Bo2g125770  | putative retroelement pol polyprotein-like protein |
| bol-miR0121-3p | Bo9g164100  | probable galacturonosyltransferase 14              |
| bol-miR0121-3p | Bo01195s040 | putative retroelement pol polyprotein-like protein |
| bol-miR0121-3p | Bo9g094370  | putative retroelement pol polyprotein-like protein |
| bol-miR0121-3p | Bo3g143940  | putative retroelement pol polyprotein-like protein |
| bol-miR0121-3p | Bo3g035830  | putative retroelement pol polyprotein-like protein |
| bol-miR0121-3p | Bo7g097690  | putative retroelement pol polyprotein-like protein |
| bol-miR0121-3p | Bo03884s010 | hypothetical protein 27.t00034                     |
| bol-miR0121-3p | Bo1g119290  | putative retroelement pol polyprotein-like protein |
| bol-miR0121-3p | Bo05773s010 | hypothetical protein 26.t00034                     |
| bol-miR0121-3p | Bo5g092980  | putative retroelement pol polyprotein-like protein |
| bol-miR0121-3p | Bo5g009610  | hypothetical protein 27.t00034                     |
| bol-miR0121-3p | Bo5g009600  | putative retroelement pol polyprotein-like protein |
| bol-miR0121-3p | Bo1g063890  | S-locus linked 3 (SLL3) protein, putative          |
| bol-miR0121-3p | Bo8g004750  | putative retroelement pol polyprotein-like protein |
| bol-miR0121-3p | Bo2g032600  | putative retroelement pol polyprotein-like protein |
| bol-miR0121-3p | Bo3g168740  | putative retroelement pol polyprotein-like protein |
| bol-miR0121-3p | Bo1g056670  | putative retroelement pol polyprotein-like protein |
| bol-miR0121-3p | Bo4g151020  | putative retroelement pol polyprotein-like protein |
| bol-miR0121-3p | Bo2g127650  | putative retroelement pol polyprotein-like protein |
| bol-miR0121-3p | Bo00685s050 | putative retroelement pol polyprotein-like protein |

---

|                |             |                                                     |
|----------------|-------------|-----------------------------------------------------|
| bol-miR0121-3p | Bo3g162130  | putative retroelement pol polyprotein-like protein  |
| bol-miR0121-3p | Bo1g091610  | putative retroelement pol polyprotein-like protein  |
| bol-miR0124-3p | Bo5g139780  | hypothetical protein CARUB_v10012826mg              |
| bol-miR0124-3p | Bo1g105740  | At2g32240/F22D22.1                                  |
| bol-miR0124-3p | Bo4g194230  | far-red impaired responsive 1-like protein          |
| bol-miR0125-3p | Bo23941s010 | gag-pol polymerase                                  |
| bol-miR0126-5p | Bo00615s100 | transcription factor bHLH99                         |
| bol-miR0127-3p | Bo2g012340  | hypothetical protein ARALYDRAFT_488346              |
| bol-miR0127-3p | Bo7g040760  | regulator of chromosome condensation family protein |
| bol-miR0127-3p | Bo4g024300  | hypothetical protein CARUB_v10006430mg, partial     |
| bol-miR0127-3p | Bo00889s060 | hypothetical protein CARUB_v10006430mg, partial     |
| bol-miR0127-3p | Bo4g115330  | putative protein                                    |
| bol-miR0127-3p | Bo5g076460  | protein RETARDED GROWTH OF EMBRYO 1                 |
| bol-miR0127-3p | Bo3g102740  | Zinc knuckle containing protein                     |
| bol-miR0127-3p | Bo7g075830  | Zinc knuckle containing protein                     |
| bol-miR0127-3p | Bo1g108700  | hypothetical protein ARALYDRAFT_318821              |
| bol-miR0127-3p | Bo01202s010 | hypothetical protein CARUB_v10006430mg, partial     |
| bol-miR0127-3p | Bo8g100350  | Zinc knuckle containing protein                     |
| bol-miR0127-3p | Bo8g034230  | hypothetical protein 27.t00123                      |
| bol-miR0127-3p | Bo8g106610  | hypothetical protein CARUB_v10008596mg              |
| bol-miR0127-3p | Bo5g122590  | unnamed protein product                             |
| bol-miR0127-3p | Bo6g018390  | basic helix-loop-helix family protein               |

---

|                |            |                                                                 |
|----------------|------------|-----------------------------------------------------------------|
| bol-miR0131-5p | Bo3g132890 | RPP13                                                           |
| bol-miR0131-5p | Bo4g050630 | unnamed protein product                                         |
| bol-miR0131-5p | Bo5g120110 | modifier of snc1,4                                              |
| bol-miR0132-5p | Bo4g098350 | protein TRANSPORT INHIBITOR RESPONSE 1                          |
| bol-miR0132-5p | Bo6g079740 | hypothetical protein CARUB_v10016894mg                          |
| bol-miR0132-5p | Bo8g098290 | hypothetical protein CARUB_v10016894mg                          |
| bol-miR0133-3p | Bo9g001120 | LOST MERISTEMS family protein                                   |
| bol-miR0133-3p | Bo7g066960 | hypothetical protein ARALYDRAFT_917224                          |
| bol-miR0134-3p | Bo6g115800 | hypothetical protein ARALYDRAFT_476359                          |
| bol-miR0134-3p | Bo6g099850 | RecName: Full=Ethylene receptor 1                               |
| bol-miR0134-3p | Bo7g074150 | hypothetical protein ARALYDRAFT_494352                          |
| bol-miR0134-3p | Bo2g093190 | hypothetical protein CARUB_v10020479mg                          |
| bol-miR0134-3p | Bo9g148420 | predicted protein                                               |
| bol-miR0134-3p | Bo4g187500 | predicted protein                                               |
| bol-miR0134-3p | Bo2g095040 | hypothetical protein CARUB_v10021868mg                          |
| bol-miR0134-3p | Bo9g175200 | hypothetical protein CARUB_v10002808mg                          |
| bol-miR0134-3p | Bo5g048840 | unnamed protein product                                         |
| bol-miR0134-3p | Bo7g113150 | DNAJ heat shock family protein                                  |
| bol-miR0134-3p | Bo4g052100 | genomes uncoupled 1 protein                                     |
| bol-miR0134-3p | Bo3g162590 | unnamed protein product                                         |
| bol-miR0134-3p | Bo1g018000 | putative ADP-ribosylation factor GTPase-activating protein AGD8 |
| bol-miR0134-3p | Bo2g130240 | ANAC096                                                         |

---

|                |             |                                                                  |
|----------------|-------------|------------------------------------------------------------------|
| bol-miR0134-3p | Bo9g007560  | hypothetical protein ARALYDRAFT_911862                           |
| bol-miR0134-3p | Bo8g098920  | hypothetical protein                                             |
| bol-miR0134-3p | Bo9g044180  | cysteine-type peptidase                                          |
| bol-miR0134-3p | Bo8g097510  | hypothetical protein 23.t00068                                   |
| bol-miR0134-3p | Bo9g092560  |                                                                  |
| bol-miR0134-3p | Bo9g169800  | putative receptor-like protein 53 kinase                         |
| bol-miR0134-5p | Bo1g017680  | ARM repeat superfamily protein                                   |
| bol-miR0134-5p | Bo6g067410  |                                                                  |
| bol-miR0134-5p | Bo4g190000  | SRK15 protein                                                    |
| bol-miR0134-5p | Bo9g092560  |                                                                  |
| bol-miR0134-5p | Bo3g069080  | putative ADP-ribosylation factor GTPase-activating protein AGD15 |
| bol-miR0135-3p | Bo2g144880  | S-locus linked 3 (SLL3) protein, putative                        |
| bol-miR0135-3p | Bo6g095880  | SLL3 ORF2 protein                                                |
| bol-miR0135-5p | Bo01039s020 | SLL3 ORF2 protein, putative                                      |
| bol-miR0135-5p | Bo9g108500  | hypothetical protein 23.t00070                                   |
| bol-miR0135-5p | Bo1g078720  | SLL3 ORF2 protein                                                |
| bol-miR0135-5p | Bo8g111100  | hypothetical protein 23.t00070                                   |
| bol-miR0135-5p | Bo8g067200  | S-locus linked 3 (SLL3) protein, putative                        |
| bol-miR0135-5p | Bo3g076290  | S-locus linked 3 (SLL3) protein, putative                        |
| bol-miR0135-5p | Bo9g084590  | protein IQ-domain 22                                             |
| bol-miR0135-5p | Bo4g144070  | hypothetical protein 23.t00070                                   |
| bol-miR0135-5p | Bo6g056380  | regulatory component of ABA receptor 3                           |

|                |            |                                                                |
|----------------|------------|----------------------------------------------------------------|
| bol-miR0135-5p | Bo9g102280 | hypothetical protein 23.t00070                                 |
| bol-miR0135-5p | Bo9g111110 | hypothetical protein ARALYDRAFT_357577                         |
| bol-miR0135-5p | Bo4g071930 |                                                                |
| bol-miR0135-5p | Bo5g048900 | S-locus linked 3 (SLL3) protein, putative                      |
| bol-miR0135-5p | Bo6g066320 | SLL3 ORF2 protein                                              |
| bol-miR0135-5p | Bo4g116850 | hypothetical protein CARUB_v10007453mg                         |
| bol-miR0135-5p | Bo5g126710 | hypothetical protein ARALYDRAFT_341728                         |
| bol-miR0135-5p | Bo5g113910 | hypothetical protein 23.t00070                                 |
| bol-miR0135-5p | Bo3g093520 | transposon related predicted protein                           |
| bol-miR0135-5p | Bo2g023770 | late embryogenesis abundant hydroxyproline-rich glycoprotein   |
| bol-miR0135-5p | Bo2g127250 | S-locus linked 3 (SLL3) protein, putative                      |
| bol-miR0135-5p | Bo3g089880 | putative PIF1 DNA helicase/replication protein A1-like protein |
| bol-miR0135-5p | Bo2g136910 | hypothetical protein 27.t00126                                 |
| bol-miR0135-5p | Bo8g111110 | SLL3 ORF2 protein, putative                                    |
| bol-miR0135-5p | Bo9g069990 | S-locus linked 3 (SLL3) protein, putative                      |
| bol-miR0135-5p | Bo9g104740 | S-locus linked 3 (SLL3) protein, putative                      |
| bol-miR0135-5p | Bo5g037510 | hypothetical protein ARALYDRAFT_313119                         |
| bol-miR0135-5p | Bo2g125760 | hypothetical protein 23.t00070                                 |
| bol-miR0135-5p | Bo2g167750 | transposon related predicted protein                           |
| bol-miR0135-5p | Bo4g098620 | unknown protein                                                |
| bol-miR0135-5p | Bo1g072410 | ABC transporter-like protein                                   |
| bol-miR0135-5p | Bo4g168110 | putative ligand-gated ion channel protein                      |

|                |            |                                                                |
|----------------|------------|----------------------------------------------------------------|
| bol-miR0136-3p | Bo6g064340 | contains similarity to a DNAJ-like domain                      |
| bol-miR0136-3p | Bo3g081870 | hypothetical protein 23.t00068                                 |
| bol-miR0136-3p | Bo4g173130 | monothiol glutaredoxin-S9                                      |
| bol-miR0136-3p | Bo6g066320 | SLL3 ORF2 protein                                              |
| bol-miR0136-3p | Bo9g111110 | hypothetical protein ARALYDRAFT_357577                         |
| bol-miR0136-3p | Bo3g143060 | hypothetical protein SORBIDRAFT_07g007510                      |
| bol-miR0136-3p | Bo4g071930 |                                                                |
| bol-miR0136-3p | Bo6g056380 | regulatory component of ABA receptor 3                         |
| bol-miR0136-3p | Bo4g145390 | hypothetical protein ARALYDRAFT_471407                         |
| bol-miR0136-3p | Bo2g149750 | S-locus linked 3 (SLL3) protein, putative                      |
| bol-miR0136-3p | Bo2g023770 | late embryogenesis abundant hydroxyproline-rich glycoprotein   |
| bol-miR0136-3p | Bo4g156200 | protein kinase-like protein                                    |
| bol-miR0136-3p | Bo3g089880 | putative PIF1 DNA helicase/replication protein A1-like protein |
| bol-miR0136-3p | Bo8g023130 | SLL3 ORF2 protein-related                                      |
| bol-miR0136-3p | Bo4g168110 | putative ligand-gated ion channel protein                      |
| bol-miR0136-3p | Bo5g080040 | Serine/threonine-protein phosphatase BSU1                      |
| bol-miR0138-3p | Bo6g099750 | transmembrane kinase 1                                         |
| bol-miR0138-3p | Bo1g063790 | hypothetical protein ARALYDRAFT_905616                         |
| bol-miR0138-3p | Bo4g157470 | protein kinase family protein                                  |
| bol-miR0138-3p | Bo9g091030 | hypothetical protein ARALYDRAFT_911432                         |
| bol-miR0138-3p | Bo1g147710 | multiple organellar RNA editing factor 3                       |
| bol-miR0138-3p | Bo7g099160 | hypothetical protein ARALYDRAFT_485357                         |

|                |            |                                                   |
|----------------|------------|---------------------------------------------------|
| bol-miR0140-5p | Bo2g161620 | unnamed protein product                           |
| bol-miR0141-3p | Bo3g078470 | protein-binding protein                           |
| bol-miR0141-3p | Bo4g165090 | Fe-deficiency induced transcription factor 1      |
| bol-miR0141-3p | Bo6g086730 | uncharacterized protein                           |
| bol-miR0141-3p | Bo4g071850 | Fe-deficiency induced transcription factor 1      |
| bol-miR0141-3p | Bo7g111330 | hypothetical protein CARUB_v10007718mg            |
| bol-miR0141-3p | Bo2g023960 | fatty acyl-CoA reductase 1                        |
| bol-miR0141-3p | Bo9g062770 | protein-binding protein                           |
| bol-miR0141-3p | Bo3g109310 | hypothetical protein ARALYDRAFT_496351            |
| bol-miR0142-3p | Bo2g001210 | hypothetical protein CARUB_v10000349mg            |
| bol-miR0144-5p | Bo7g007190 |                                                   |
| bol-miR0144-5p | Bo6g108620 | unknown protein                                   |
| bol-miR0144-5p | Bo2g086500 | hypothetical protein ARALYDRAFT_895460            |
| bol-miR0144-5p | Bo8g011600 | hypothetical protein ARALYDRAFT_474085            |
| bol-miR0144-5p | Bo4g109710 | hypothetical protein ARALYDRAFT_486243            |
| bol-miR0144-5p | Bo6g073290 | SQUAMOSA promoter binding protein-like protein 15 |
| bol-miR0146-5p | Bo4g023950 | hypothetical protein ARALYDRAFT_483599            |
| bol-miR0146-5p | Bo3g170540 | LL-diaminopimelate aminotransferase               |
| bol-miR0146-5p | Bo7g113240 | unnamed protein product                           |
| bol-miR0146-5p | Bo5g101220 | hypothetical protein CARUB_v10015031mg            |
| bol-miR0146-5p | Bo6g092790 | hypothetical protein ARALYDRAFT_476336            |
| bol-miR0146-5p | Bo6g076170 | polyamine oxidase 3                               |

|                |            |                                             |
|----------------|------------|---------------------------------------------|
| bol-miR0146-5p | Bo5g004230 | G-box binding factor 4                      |
| bol-miR0146-5p | Bo4g081240 | hypothetical protein 27.t00123              |
| bol-miR0146-5p | Bo8g038040 | protein kinase family protein               |
| bol-miR0146-5p | Bo2g091240 | hypothetical protein ARALYDRAFT_895570      |
| bol-miR0146-5p | Bo4g045810 | putative dolichol kinase                    |
| bol-miR0146-5p | Bo9g005970 | hypothetical protein CARUB_v10003318mg      |
| bol-miR0146-5p | Bo4g191720 | hypothetical protein ARALYDRAFT_903634      |
| bol-miR0146-5p | Bo3g157150 | hypothetical protein CARUB_v100241591mg     |
| bol-miR0146-5p | Bo6g081090 | nuclear pore anchor                         |
| bol-miR0146-5p | Bo3g034850 | hypothetical protein ARALYDRAFT_321718      |
| bol-miR0147-3p | Bo5g008150 | sugar transport protein 2                   |
| bol-miR0147-3p | Bo6g079190 | hypothetical protein 40.t00055              |
| bol-miR0147-3p | Bo9g019090 | hypothetical protein 40.t00055              |
| bol-miR0147-3p | Bo1g002980 | pentatricopeptide repeat-containing protein |
| bol-miR0147-3p | Bo6g055960 |                                             |
| bol-miR0147-3p | Bo5g128880 | hypothetical protein CARUB_v10013153mg      |
| bol-miR0147-3p | Bo3g109590 | hypothetical protein 40.t00055              |
| bol-miR0147-3p | Bo2g096120 | glycosyltransferase family protein 64       |
| bol-miR0147-3p | Bo3g054360 | hypothetical protein CARUB_v10000192mg      |
| bol-miR0147-3p | Bo1g021890 | hypothetical protein 40.t00055              |
| bol-miR0148-5p | Bo3g141470 | GYF domain-containing protein               |
| bol-miR0149-3p | Bo5g010440 | unnamed protein product                     |



|                |             |                                                                                    |
|----------------|-------------|------------------------------------------------------------------------------------|
| bol-miR0149-3p | Bo5g065870  | hypothetical protein ARALYDRAFT_473645                                             |
| bol-miR0151-3p | Bo5g004930  | Similar to gi 3217452 F45E6.3 gene product from <i>C. elegans</i> cosmid gb Z68117 |
| bol-miR0151-3p | Bo00846s040 | hypothetical protein CARUB_v10016251mg                                             |
| bol-miR0151-3p | Bo8g004260  | ankyrin repeat-containing protein                                                  |
| bol-miR0151-3p | Bo4g130790  | RabGAP/TBC domain-containing protein                                               |
| bol-miR0152-3p | Bo8g058460  |                                                                                    |
| bol-miR0152-3p | Bo1g020190  | hypothetical protein ARALYDRAFT_492951                                             |
| bol-miR0152-3p | Bo9g061550  | hypothetical protein CARUB_v10028530mg                                             |
| bol-miR0152-3p | Bo7g106440  | hypothetical protein ARALYDRAFT_492951                                             |
| bol-miR0155-3p | Bo00884s080 | At3g50100                                                                          |
| bol-miR0156-3p | Bo00982s010 | eukaryotic translation initiation factor 3 subunit C                               |
| bol-miR0156-3p | Bo1g108610  | hypothetical protein 24.t00017                                                     |
| bol-miR0156-3p | Bo6g087200  | hypothetical protein CARUB_v10025259mg                                             |
| bol-miR0156-3p | Bo9g095470  | leucine-rich repeat family protein                                                 |
| bol-miR0156-3p | Bo4g177560  | ACT domain-containing small subunit of acetolactate synthase protein               |
| bol-miR0156-3p | Bo5g076300  | hypothetical protein CARUB_v10009677mg                                             |
| bol-miR0157-3p | Bo01150s010 | zinc knuckle containing protein                                                    |
| bol-miR0157-3p | Bo2g102210  | ethylene responsive element binding factor -related                                |
| bol-miR0157-3p | Bo6g043880  | ethylene responsive element binding factor -related                                |
| bol-miR0157-3p | Bo8g036690  |                                                                                    |
| bol-miR0157-3p | Bo6g095010  | hypothetical protein 40.t00059                                                     |
| bol-miR0157-3p | Bo1g117780  |                                                                                    |

|                |            |                                                                              |
|----------------|------------|------------------------------------------------------------------------------|
| bol-miR0157-3p | Bo8g108760 | hypothetical protein CARUB_v10010008mg                                       |
| bol-miR0157-3p | Bo3g120950 | ethylene responsive element binding factor -related                          |
| bol-miR0157-3p | Bo7g009920 |                                                                              |
| bol-miR0157-3p | Bo9g076340 | zinc knuckle containing protein                                              |
| bol-miR0157-3p | Bo6g072450 | ethylene responsive element binding factor -related                          |
| bol-miR0157-3p | Bo7g052680 | hypothetical protein 31.t00049                                               |
| bol-miR0157-3p | Bo3g089920 |                                                                              |
| bol-miR0157-3p | Bo4g135820 | glycosyl hydrolase family protein 17                                         |
| bol-miR0157-3p | Bo5g052060 | zinc knuckle containing protein                                              |
| bol-miR0157-3p | Bo4g060020 | hypothetical protein                                                         |
| bol-miR0157-3p | Bo2g116350 |                                                                              |
| bol-miR0157-3p | Bo4g075410 | zinc knuckle containing protein                                              |
| bol-miR0157-3p | Bo5g098540 | predicted protein                                                            |
| bol-miR0157-3p | Bo4g072020 | zinc knuckle containing protein                                              |
| bol-miR0157-3p | Bo8g012730 | zinc knuckle containing protein                                              |
| bol-miR0157-3p | Bo6g099250 | zinc knuckle containing protein                                              |
| bol-miR0160-5p | Bo4g050930 | unnamed protein product                                                      |
| bol-miR0160-5p | Bo2g155130 | unnamed protein product                                                      |
| bol-miR0160-5p | Bo4g080010 | unnamed protein product                                                      |
| bol-miR0161-5p | Bo6g072290 | RecName: Full=Fatty acyl-CoA reductase 6, chloroplastic;<br>Flags: Precursor |
| bol-miR0161-5p | Bo1g124850 | coatomer subunit beta's;-3                                                   |
| bol-miR0161-5p | Bo8g081490 | uncharacterized protein                                                      |

|                |            |                                                    |
|----------------|------------|----------------------------------------------------|
| bol-miR0161-5p | Bo1g103860 | disease resistance protein                         |
| bol-miR0161-5p | Bo5g147000 | pentatricopeptide repeat-containing protein        |
| bol-miR0162-5p | Bo3g006730 | hypothetical protein CARUB_v10002286mg             |
| bol-miR0162-5p | Bo9g171910 | hypothetical protein CARUB_v10002286mg             |
| bol-miR0163-5p | Bo9g171450 | transducin/WD40 domain-containing protein          |
| bol-miR0163-5p | Bo7g111330 | hypothetical protein CARUB_v10007718mg             |
| bol-miR0164-3p | Bo9g163250 | hypothetical protein ARALYDRAFT_488485             |
| bol-miR0164-3p | Bo5g068210 | FRIGIDA-LIKE 2                                     |
| bol-miR0165-3p | Bo7g084070 | uncharacterized protein                            |
| bol-miR0166-3p | Bo7g082370 | regulator of G-protein signaling 1                 |
| bol-miR0167-5p | Bo6g110750 | hypothetical protein CARUB_v10009149mg             |
| bol-miR0167-5p | Bo5g148540 | vacuolar import/degradation, Vid27-related protein |
| bol-miR0167-5p | Bo7g031860 | unnamed protein product                            |
| bol-miR0167-5p | Bo4g027520 | hypothetical protein CARUB_v10002158mg             |
| bol-miR0167-5p | Bo6g043920 | predicted protein                                  |
| bol-miR0167-5p | Bo8g100030 | hypothetical protein CARUB_v10022803mg, partial    |
| bol-miR0170-5p | Bo7g099000 | hypothetical protein ARALYDRAFT_496339             |
| bol-miR0175-3p | Bo7g073930 | cysteine proteinase                                |
| bol-miR0175-3p | Bo2g127490 | senescence-specific cysteine protease              |
| bol-miR0177-5p | Bo2g001090 | uncharacterized protein                            |
| bol-miR0177-5p | Bo5g008300 | hypothetical protein ARALYDRAFT_470784             |
| bol-miR0177-5p | Bo1g077110 | At4g20730                                          |

---

|                |            |                                                     |
|----------------|------------|-----------------------------------------------------|
| bol-miR0181-3p | Bo2g034150 | hypothetical protein ARALYDRAFT_495743              |
| bol-miR0181-3p | Bo9g126080 | hypothetical protein ARALYDRAFT_495743              |
| bol-miR0183-5p | Bo5g147010 | hypothetical protein CARUB_v10015860mg              |
| bol-miR0183-5p | Bo5g039610 | pentatricopeptide repeat-containing protein         |
| bol-miR0183-5p | Bo8g032330 | pentatricopeptide repeat-containing protein         |
| bol-miR0184-5p | Bo6g095950 | hypothetical protein CARUB_v10021318mg, partial     |
| bol-miR0187-3p | Bo9g097420 | hypothetical protein CARUB_v10018755mg              |
| bol-miR0187-3p | Bo7g106550 | hypothetical protein CARUB_v10004208mg              |
| bol-miR0187-3p | Bo2g055480 | hypothetical protein CARUB_v10021326mg              |
| bol-miR0187-3p | Bo5g085040 | hypothetical protein 27.t00104                      |
| bol-miR0187-3p | Bo4g187100 | actin 3                                             |
| bol-miR0189-3p | Bo3g007210 | uncharacterized protein                             |
| bol-miR0189-3p | Bo9g169960 | uncharacterized protein                             |
| bol-miR0190-3p | Bo9g011170 | uncharacterized protein                             |
| bol-miR0190-3p | Bo7g095680 | uncharacterized protein                             |
| bol-miR0190-3p | Bo9g135690 | mutator-like transposase                            |
| bol-miR0193-5p | Bo9g026020 | predicted protein                                   |
| bol-miR0194-5p | Bo1g134930 | beta-fructofuranosidase, insoluble isoenzyme CWINV1 |
| bol-miR0195-5p | Bo6g018770 | hypothetical protein ARALYDRAFT_474131              |
| bol-miR0196-5p | Bo4g084890 |                                                     |
| bol-miR0198-3p | Bo1g144140 | hypothetical protein CARUB_v10013217mg              |
| bol-miR0200-3p | Bo9g130840 | 14-3-3-like protein GF14 Upsilon                    |

---

---

|                |             |                                                 |
|----------------|-------------|-------------------------------------------------|
| bol-miR0201-5p | Bo00616s160 | hypothetical protein CERSUDRAFT_61265, partial  |
| bol-miR0201-5p | Bo3g064330  | hypothetical protein MTR_5g051120               |
| bol-miR0201-5p | Bo00285s020 | hypothetical protein J056_003247                |
| bol-miR0201-5p | Bo00616s010 | PREDICTED: uncharacterized protein LOC101508810 |
| bol-miR0201-5p | Bo03378s010 | hypothetical protein J056_003247                |

---
