# Supplementary material
Source: MDPI journal article supplement (https://www.mdpi.com/2311-7524/9/4/515)
Supplement: s1 [file s1]

**Table S2.** The filtering for small RNA clean reads in the libraries of MF and CMS

| Type                    | MF          |            | CMS         |            |
|-------------------------|-------------|------------|-------------|------------|
|                         | Total reads | Percentage | Total reads | Percentage |
| Total reads number      | 6866663     | 100.00%    | 6895083     | 100.00%    |
| Filter having 'N' tags  | 84130       | 1.23%      | 85076       | 1.23%      |
| Filter low quality tags | 0           | 0.00%      | 0           | 0.00%      |
| 3' adapter insert null  | 6           | 0.00%      | 3           | 0.00%      |
| 5'adapter conntaminants | 2           | 0.00%      | 1           | 0.00%      |
| Length <16              | 203600      | 2.97%      | 175740      | 2.55%      |
| Length >30              | 1115674     | 16.25%     | 983718      | 14.27%     |
| PloyA                   | 305171      | 4.44%      | 311741      | 4.52%      |
| Clean number            | 5158080     | 75.12%     | 5338804     | 77.43%     |
| Unique number           | 3165088     | 46.09%     | 3269277     | 47.41%     |
