# Supplementary material
Source: MDPI journal article supplement (https://www.mdpi.com/2311-7524/9/4/515)
Supplement: s1 [file s1]

**Table S3** Novel miRNAs were identified from the MF and CMS lines in cabbage.

| <b>miRNA name</b> | <b>miR-seq</b>           | <b>LM</b> | <b>LP</b> | <b>MFE (kcal/Mol)</b> | <b>MF</b> | <b>CMS</b> |
|-------------------|--------------------------|-----------|-----------|-----------------------|-----------|------------|
| bol-miR0001-3p    | ACGTTGGCTCGAGAGATGGGA    | 21        | 75        | -35.6                 | 1         | 2          |
| bol-miR0002-3p    | AGGAATATCAGATGGCATGAAATC | 24        | 94        | -18.2                 | 5         | 0          |
| bol-miR0003-5p    | ATTAGAGACTCGGAGAAGCCCTGT | 24        | 78        | -24.1                 | 9         | 3          |
| bol-miR0004-5p    | TTTAGTCGAATATAAGAAACA    | 21        | 91        | -19.8                 | 2         | 1          |
| bol-miR0005-3p    | GAAGCTTATGGGACATGCTT     | 20        | 82        | -21.8                 | 0         | 3          |
| bol-miR0006-3p    | AGCTCAAACGTCTTAGAACT     | 20        | 83        | -20                   | 4         | 0          |
| bol-miR0007-5p    | TTGGACTCAACGGATCTCCCC    | 21        | 73        | -21                   | 3         | 1          |
| bol-miR0008-3p    | AACAAAGAATTGCAGAGTTTGATC | 24        | 91        | -19.5                 | 2         | 4          |
| bol-miR0009-3p    | AGACTAATGAGATTGTGTTT     | 20        | 83        | -19.1                 | 1         | 2          |
| bol-miR0010-3p    | ATTCATGGATATATAGACCGAGGT | 24        | 101       | -23.8                 | 2         | 2          |
| bol-miR0011-5p    | CCGCAAGAGAATCCATCGCAGG   | 22        | 75        | -21.7                 | 0         | 5          |
| bol-miR0012-3p    | ATATCTATATGAGAGTTCCTGA   | 22        | 94        | -21.9                 | 5         | 3          |
| bol-miR0013-5p    | ATATAAGTATGTGGTAAACCTCAA | 24        | 87        | -27.9                 | 2         | 3          |

|                |                          |    |     |        |    |     |
|----------------|--------------------------|----|-----|--------|----|-----|
| bol-miR0014-3p | TTGTTGTGGCTTTGACTTGTT    | 21 | 98  | -30.8  | 0  | 35  |
| bol-miR0015-5p | GAGCTTGAGAATGTTATGTTC    | 21 | 80  | -22    | 3  | 7   |
| bol-miR0016-3p | TTCATGAGATTCTTCACGGTT    | 21 | 91  | -18.4  | 7  | 3   |
| bol-miR0017-5p | CAAAGAACTGTTGAGAATGAA    | 21 | 94  | -19.2  | 3  | 1   |
| bol-miR0018-5p | GATTTGGATTGGCTTCAAGGC    | 21 | 93  | -21.02 | 2  | 1   |
| bol-miR0019-3p | TTGGACTGAAGGGGATTCCAA    | 21 | 98  | -23.8  | 8  | 3   |
| bol-miR0020-3p | AGACTGTTTTGGAGAAGTTGGAAG | 24 | 97  | -20.4  | 2  | 4   |
| bol-miR0021-3p | GGAAATTCGTCGGAAAGTTCCAA  | 23 | 100 | -21.6  | 5  | 4   |
| bol-miR0022-5p | AACAGAGGATTTGATATATGCACC | 24 | 93  | -18.6  | 3  | 1   |
| bol-miR0023-3p | GCAAGTTGACTTTGGCTCTGT    | 21 | 98  | -36    | 52 | 155 |
| bol-miR0024-3p | TTGCGTGAGATGATTGATGCT    | 21 | 79  | -18.2  | 2  | 6   |
| bol-miR0025-3p | AGGCTGGTTTAGTATCAATTAAAC | 24 | 99  | -38.5  | 1  | 3   |
| bol-miR0026-5p | TTGATCTTCATCTTGAATGTC    | 21 | 91  | -26.3  | 24 | 14  |
| bol-miR0027-5p | TTTGGACTTGACGGCACTGTA    | 21 | 93  | -26.1  | 2  | 1   |

|                |                         |    |    |        |    |    |
|----------------|-------------------------|----|----|--------|----|----|
| bol-miR0028-3p | TTCAGGACCGATGGATTCTCC   | 21 | 84 | -18.9  | 3  | 2  |
| bol-miR0029-5p | TTGGCTGAGAGCTACTTAATC   | 21 | 92 | -19.44 | 0  | 4  |
| bol-miR0030-3p | CGGCGAGTTTTCTTCTGCTGA   | 21 | 90 | -23.65 | 35 | 24 |
| bol-miR0031-3p | TGTGGTGTAAGTTTTATCGA    | 21 | 82 | -24.5  | 1  | 2  |
| bol-miR0032-3p | ATAGAATTTTCAGTTTTCAAACC | 22 | 91 | -22.9  | 2  | 3  |
| bol-miR0033-5p | ATTGTTTTGGTTTGACTCGGT   | 21 | 80 | -22    | 2  | 2  |
| bol-miR0034-5p | CTTTAATCTTTATTTACTTGT   | 21 | 90 | -20.7  | 4  | 1  |
| bol-miR0035-5p | CCTAGGAGGACAAATCAATATT  | 22 | 83 | -19.9  | 1  | 4  |
| bol-miR0036-3p | GATAAAGTGAAATTTCTCGAC   | 21 | 98 | -18.1  | 1  | 2  |
| bol-miR0037-5p | TTACTGATGAAGATTTTGAAG   | 21 | 93 | -22.7  | 6  | 3  |
| bol-miR0038-3p | TGTTGAGGAATCTCTGAATTCT  | 22 | 95 | -19.25 | 0  | 4  |
| bol-miR0039-5p | ATGGTCAAGAAACACTGAGTC   | 21 | 89 | -23.4  | 2  | 3  |
| bol-miR0040-5p | GAAGAGGTAGAGTTGTTGCCA   | 21 | 88 | -31.43 | 2  | 1  |
| bol-miR0041-3p | AGGTACTCCATGGAGTCTTAAGA | 23 | 74 | -26.1  | 3  | 4  |

---

|                |                          |    |     |        |   |    |
|----------------|--------------------------|----|-----|--------|---|----|
| bol-miR0042-3p | ATGCGTTTCAACTAAAGAAAGGCA | 24 | 101 | -28.4  | 3 | 0  |
| bol-miR0043-3p | GTAACCGAGTCGGTTTGATGT    | 21 | 78  | -25.7  | 3 | 0  |
| bol-miR0044-5p | TATACAAATGTAGACATGGCA    | 21 | 95  | -18.6  | 7 | 0  |
| bol-miR0045-3p | ATTGATTTATCGGTTTGACGA    | 21 | 69  | -22.9  | 2 | 2  |
| bol-miR0046-3p | TTTCTCTTCTTTTTGCACTCTC   | 22 | 99  | -32.4  | 5 | 3  |
| bol-miR0047-5p | AGATTTGGTCAAAGATGACGC    | 21 | 76  | -20.1  | 3 | 1  |
| bol-miR0048-5p | TCTTTGTGGAGAGAAAGAGAGA   | 22 | 77  | -18.9  | 1 | 2  |
| bol-miR0049-3p | GATGAAATGCCTGAGAGAAGTCT  | 23 | 82  | -18.6  | 9 | 10 |
| bol-miR0050-5p | AATTGAGATTGATATTTTTAAAGA | 24 | 101 | -19.84 | 1 | 2  |
| bol-miR0051-3p | TTGGAGCATCTGGAGTTGTTAG   | 22 | 86  | -21.1  | 0 | 1  |
| bol-miR0051-5p | ATTTCTTTCTAGGCTGTGGTT    | 21 | 86  | -21.1  | 5 | 10 |
| bol-miR0052-3p | TCTTGATACAAGAATCTGACC    | 21 | 75  | -18.7  | 0 | 5  |
| bol-miR0053-5p | CTTTAAAATCTAGTGTTATTGAAA | 24 | 80  | -20.1  | 7 | 1  |
| bol-miR0054-3p | GAGAATTATGGAGAAGAAGACGA  | 23 | 100 | -26.8  | 1 | 3  |

---

|                |                         |    |    |       |    |    |
|----------------|-------------------------|----|----|-------|----|----|
| bol-miR0055-3p | TGTTTTGCGAGTTTTTATTGA   | 21 | 98 | -20.2 | 3  | 2  |
| bol-miR0056-5p | TATGTTTTGGATTGCTATGG    | 21 | 73 | -18.4 | 4  | 2  |
| bol-miR0057-3p | CTTGGAAGCTCTGACGGAGA    | 21 | 71 | -22.1 | 21 | 8  |
| bol-miR0058-3p | TTGGCAATTCTTTTACAAGCC   | 21 | 89 | -18   | 3  | 0  |
| bol-miR0059-5p | ATAAACGACGTCGTTTTATCTCG | 24 | 75 | -28.9 | 4  | 1  |
| bol-miR0060-5p | TGGTTTCATATACACCTCTTC   | 21 | 76 | -24.5 | 1  | 5  |
| bol-miR0061-3p | TTTGGATGGTAAAAAGTGAGA   | 21 | 83 | -19.4 | 3  | 1  |
| bol-miR0062-5p | TGAGAACTGAGAAGTTACCTGA  | 22 | 88 | -20.9 | 1  | 2  |
| bol-miR0063-3p | GGGTATTATCCGAACCGAACC   | 21 | 98 | -30.1 | 2  | 2  |
| bol-miR0064-3p | TTGGTGTCTTGCTCATAGTA    | 20 | 93 | -20.1 | 3  | 1  |
| bol-miR0065-5p | TCATAGAGCTTGATGAATAGGTA | 23 | 82 | -19.2 | 2  | 1  |
| bol-miR0066-5p | TTAGAATCCGCCTGAGTCAAG   | 21 | 74 | -18.1 | 12 | 10 |
| bol-miR0067-5p | ATGTTGGAATTGTAGTGGACT   | 21 | 79 | -19.2 | 2  | 3  |
| bol-miR0068-3p | CGGAGGAAACAGCAACGGAGGA  | 22 | 85 | -21.2 | 4  | 1  |

|                |                           |    |     |        |    |    |
|----------------|---------------------------|----|-----|--------|----|----|
| bol-miR0069-3p | CTGAAGTCGCTGCCTATGGCGT    | 22 | 80  | -18.8  | 0  | 4  |
| bol-miR0070-3p | GCGTATGAGGAGCCATGCATA     | 21 | 101 | -47.8  | 0  | 1  |
| bol-miR0070-5p | TGCCTGGCTCCCTGTATGCCATATG | 25 | 101 | -47.8  | 15 | 11 |
| bol-miR0071-3p | TTTAAGGATGCGTTGGATATG     | 21 | 76  | -18    | 3  | 1  |
| bol-miR0072-5p | ATCTCCATTGTTTTGAGACCG     | 21 | 85  | -21.9  | 2  | 1  |
| bol-miR0073-3p | AATAACAAGAGAGAACTCTGAAGC  | 24 | 101 | -18.2  | 3  | 1  |
| bol-miR0074-3p | TTTGAGTGAATCTTACTGGCT     | 21 | 78  | -22.5  | 2  | 1  |
| bol-miR0075-5p | ATTGCATTGGATGTAGCTCGA     | 21 | 92  | -36.3  | 2  | 4  |
| bol-miR0076-5p | TTCCGGTAAAAACCTCACCA      | 20 | 76  | -22    | 4  | 3  |
| bol-miR0077-5p | CTATGGTATTGATGACTCAGT     | 21 | 83  | -18.7  | 3  | 3  |
| bol-miR0078-3p | AGAGATGACTTGAGACATGTAAGT  | 24 | 89  | -27.59 | 9  | 14 |
| bol-miR0079-5p | ATCTGGATGATACATTTGAATGAG  | 24 | 92  | -29.8  | 9  | 8  |
| bol-miR0080-5p | TCTTTGGGGAATTTGAAGCCA     | 21 | 94  | -21.1  | 2  | 1  |
| bol-miR0081-5p | GTTGGATTGAATTGGGCTCCA     | 21 | 89  | -21.9  | 6  | 2  |

|                |                          |    |    |        |    |    |
|----------------|--------------------------|----|----|--------|----|----|
| bol-miR0082-3p | TTGATTTCTCGGTTGGAGATT    | 21 | 97 | -19.9  | 2  | 2  |
| bol-miR0083-3p | ATGGAGATCTTATGTGGATATGCT | 24 | 97 | -19.2  | 5  | 4  |
| bol-miR0084-5p | AAAGGGAGAGATTGATATCTTGGC | 24 | 93 | -24.3  | 20 | 10 |
| bol-miR0085-3p | TTTCGTCTTCAAGCTATGGAGC   | 22 | 96 | -23.8  | 17 | 12 |
| bol-miR0086-5p | GATCGAATCCACAAAGAATTAGA  | 23 | 94 | -23.9  | 3  | 0  |
| bol-miR0087-5p | TTTGTGGCTAAGTTTCGATTT    | 21 | 93 | -22.1  | 55 | 58 |
| bol-miR0088-3p | AATGTAGAATCCTTAGCAGA     | 20 | 83 | -21.8  | 2  | 1  |
| bol-miR0089-5p | TAGGGTTGAGTTCTTGACGGA    | 21 | 84 | -26.1  | 1  | 14 |
| bol-miR0090-3p | TGATTTGGAAGTGGGATAGGT    | 21 | 77 | -18.3  | 2  | 2  |
| bol-miR0091-3p | CAGTCGCACCAATTGATGGAT    | 21 | 91 | -19.83 | 2  | 3  |
| bol-miR0092-5p | GAATAGCCATGTGCTCTGCA     | 20 | 68 | -26.8  | 2  | 4  |
| bol-miR0093-3p | TGTTGTGTTGGTTTTGACCCG    | 21 | 84 | -22.1  | 8  | 3  |
| bol-miR0094-5p | ATATAAACCGAACTAAACCGAAGT | 24 | 76 | -31.1  | 1  | 2  |
| bol-miR0095-3p | ACATGGCTGTTGTTTTACCA     | 20 | 96 | -23.5  | 1  | 2  |

|                |                          |    |     |        |    |    |
|----------------|--------------------------|----|-----|--------|----|----|
| bol-miR0096-5p | TGGCCAGAGGATTCACACAAG    | 21 | 63  | -19.6  | 7  | 7  |
| bol-miR0097-3p | GTGCGATGCTAGTGACTATGCT   | 22 | 99  | -27.3  | 2  | 7  |
| bol-miR0097-5p | TCTGGTGAGTGCTCCCATTGTGCA | 24 | 99  | -27.3  | 0  | 1  |
| bol-miR0098-3p | CGAGTGAACCTTGAGCGACAAG   | 21 | 80  | -24.7  | 2  | 6  |
| bol-miR0099-5p | TGACGAGCTTGAGGACGACCT    | 21 | 80  | -23.9  | 5  | 2  |
| bol-miR0100-5p | AGAAAAAATCGAGAACTTCA     | 21 | 77  | -18.5  | 6  | 2  |
| bol-miR0101-3p | CTTGACTAGGACGGTCTGAGGCTT | 24 | 101 | -21.8  | 9  | 13 |
| bol-miR0101-5p | AGCCAGTGATGATTAGATTCAA   | 22 | 101 | -21.8  | 1  | 7  |
| bol-miR0102-3p | ACTTTGTATTTGTAGAGACGA    | 21 | 79  | -23.3  | 4  | 3  |
| bol-miR0103-3p | TTTGGATCGAATGGAGCTCCA    | 21 | 96  | -21.41 | 16 | 6  |
| bol-miR0104-3p | ACTTTTACTTGTTGAAATGACTCT | 24 | 81  | -18.5  | 2  | 1  |
| bol-miR0105-5p | AGTTCTGATGAAATTCCGGC     | 20 | 94  | -21    | 2  | 1  |
| bol-miR0106-3p | GATCCAACACTTGGTAGCAACTGA | 24 | 101 | -25.2  | 0  | 4  |
| bol-miR0107-3p | ATTGGATTGATTCTTTGCCGA    | 21 | 75  | -21.9  | 4  | 2  |



|                |                          |    |    |       |     |     |
|----------------|--------------------------|----|----|-------|-----|-----|
| bol-miR0108-3p | GAGACTCAAACATTTCAAGT     | 20 | 97 | -19.8 | 3   | 2   |
| bol-miR0109-3p | TTCCCAAATGTAGACAAAGCAAT  | 23 | 90 | -35.3 | 652 | 673 |
| bol-miR0110-3p | TCAGAGAGACGATGACTTTGC    | 21 | 77 | -20.1 | 3   | 3   |
| bol-miR0111-5p | AAATTGGGCTTGAATTTGCCT    | 21 | 70 | -18.8 | 1   | 2   |
| bol-miR0112-5p | ATGGCTGGGAACTCTTTACAAACT | 24 | 81 | -21.5 | 2   | 1   |
| bol-miR0113-3p | CAAAGGTTTATGAAGAGTTTTA   | 22 | 87 | -22.4 | 2   | 5   |
| bol-miR0114-3p | TTTTTGATAGGAAAACGGTAA    | 21 | 92 | -25.5 | 3   | 0   |
| bol-miR0115-3p | ATTTGGATAAAGATTCTGCCA    | 21 | 93 | -20.6 | 3   | 3   |
| bol-miR0116-5p | CTTGGTAATCGCCGGTAACCGC   | 22 | 79 | -26   | 4   | 0   |
| bol-miR0117-5p | AATATTTTTGAAAACTTTTTTGGC | 24 | 96 | -21.6 | 8   | 4   |
| bol-miR0118-3p | CGGGAATTCAGGAAAAATTCT    | 21 | 75 | -20.6 | 1   | 2   |
| bol-miR0119-5p | AAATTCAAACCTTGATCTAGA    | 21 | 97 | -18.8 | 4   | 0   |
| bol-miR0120-3p | TAGGTCAATTAGTTGCAACTGG   | 22 | 72 | -38.3 | 0   | 3   |
| bol-miR0121-3p | CTGGAATGGTTTGAGCAGCTT    | 21 | 97 | -19   | 0   | 3   |
| bol-miR0122-5p | TTTGGCGGGTGATAGAGCAGACA  | 23 | 99 | -30.4 | 4   | 3   |
| bol-miR0123-3p | ATATGTAGAAATCTCTATTTTTGA | 24 | 88 | -20.7 | 13  | 4   |
| bol-miR0124-3p | GTTCAAATTTCTTCAAAGTCT    | 21 | 85 | -21.2 | 4   | 1   |

---

|                        |                          |    |    |        |    |    |
|------------------------|--------------------------|----|----|--------|----|----|
| bol-<br>miR0125-<br>3p | AAGGATCATGTTGTAATAACAAAT | 24 | 94 | -18    | 3  | 0  |
| bol-<br>miR0126-<br>5p | TGTTTTTTGGGTTTAACTGA     | 21 | 81 | -21.7  | 3  | 4  |
| bol-<br>miR0127-<br>3p | TGAAGTTTCTCGATTTTTTCT    | 21 | 77 | -18.5  | 7  | 11 |
| bol-<br>miR0128-<br>5p | AATTTATCTCTGATGGACCGGATC | 24 | 97 | -24.2  | 4  | 2  |
| bol-<br>miR0129-<br>3p | AGGAATTGCTGAGTTTGTCTT    | 21 | 79 | -20.4  | 3  | 5  |
| bol-<br>miR0130-<br>3p | AATCTGTATTCAGTTGGTACA    | 21 | 98 | -21.2  | 3  | 1  |
| bol-<br>miR0131-<br>5p | ATATGTGTTACGACGAACGAGCAA | 24 | 92 | -19.82 | 3  | 8  |
| bol-<br>miR0132-<br>5p | GACTCGAGACCAGAGAGCTGCC   | 22 | 89 | -26    | 3  | 1  |
| bol-<br>miR0133-<br>3p | AGAGAGCTGTTGATTGAGCCG    | 21 | 72 | -20.9  | 51 | 34 |
| bol-<br>miR0134-<br>3p | TTTTTCGGATTTTCGGATT      | 19 | 67 | -19.2  | 3  | 4  |
| bol-<br>miR0134-<br>5p | TTCGGATATCCGTTTAGGTTC    | 21 | 67 | -19.2  | 0  | 1  |
| bol-<br>miR0135-<br>3p | TCATCGGAATTTGGTCGGAAATT  | 23 | 76 | -27.8  | 7  | 5  |
| bol-<br>miR0135-<br>5p | TTCCGACGACATTTCCGACAAA   | 22 | 76 | -27.8  | 0  | 2  |
| bol-<br>miR0136-<br>3p | ATATTCCGACGGATTTCTGACGAC | 24 | 76 | -18.9  | 8  | 8  |

---

|                |                          |    |     |       |     |     |
|----------------|--------------------------|----|-----|-------|-----|-----|
| bol-miR0137-3p | AAGTAGTTGTAAAAACCTTGT    | 21 | 97  | -21.2 | 1   | 2   |
| bol-miR0138-3p | TGTTCTCTGGGTTTTGATCGG    | 21 | 85  | -20.3 | 21  | 15  |
| bol-miR0139-3p | AGAAGTTTAGAACTCGTTCGGGTA | 24 | 84  | -25.5 | 2   | 1   |
| bol-miR0140-5p | CTATGTCGTTTCCTATTTAGT    | 21 | 83  | -21.9 | 5   | 13  |
| bol-miR0141-3p | GAGATCTCTTGTTTCGGACA     | 20 | 78  | -18.2 | 1   | 4   |
| bol-miR0142-3p | CCTTCTCATCGATGGTCTAGA    | 21 | 98  | -24.8 | 527 | 168 |
| bol-miR0143-3p | ATTTATGGTAGATTCTATAGTATA | 24 | 101 | -20.8 | 2   | 2   |
| bol-miR0144-3p | TGCTCACCTCTCTTTCTGTCAGT  | 23 | 99  | -51.5 | 1   | 4   |
| bol-miR0144-5p | CAGAAGAGAGTGAGCACATGC    | 21 | 99  | -51.5 | 63  | 68  |
| bol-miR0145-5p | TATATTATTGTTAGATTCACAA   | 22 | 95  | -18.4 | 7   | 7   |
| bol-miR0146-5p | GGATGAGGAAGAAGAGATCATC   | 22 | 83  | -18.2 | 1   | 2   |
| bol-miR0147-3p | GGTGATGAGAAGCTGAGTTGA    | 21 | 89  | -25.5 | 1   | 3   |
| bol-miR0148-5p | ATGAACTCGAAATCAGAAGCG    | 21 | 92  | -20   | 5   | 3   |
| bol-miR0149-3p | AGAGAAGCGAACGAGGAAGCG    | 21 | 70  | -18.8 | 1   | 2   |

|                |                          |    |     |        |    |    |
|----------------|--------------------------|----|-----|--------|----|----|
| bol-miR0150-5p | AACTAATGTAGATAGTCTAACAGG | 24 | 82  | -20.24 | 2  | 2  |
| bol-miR0151-3p | TGATCCATCTGAATGCATAGA    | 21 | 98  | -22.5  | 2  | 1  |
| bol-miR0152-3p | AAGCCTCGGAATGGGAGGCCT    | 21 | 89  | -23.7  | 2  | 1  |
| bol-miR0153-3p | ATTCATTTGGGATAACATGTAAAA | 24 | 101 | -19.53 | 3  | 6  |
| bol-miR0154-5p | ATGAATGATCATAGAAATATATA  | 23 | 88  | -18.6  | 15 | 11 |
| bol-miR0155-3p | GTGGAGTATGACTGAAAACCA    | 21 | 85  | -18.6  | 4  | 0  |
| bol-miR0156-3p | ATATATAAGTTGTATGAAGA     | 20 | 95  | -18.4  | 3  | 2  |
| bol-miR0157-3p | CGGCTCTGATACCAATTGATG    | 21 | 82  | -42.7  | 2  | 3  |
| bol-miR0158-5p | GTTTGTGAATTTGGATAAAACA   | 22 | 77  | -20.5  | 0  | 5  |
| bol-miR0159-3p | ACTTGCTTTCTCTACTGACCTAGA | 24 | 100 | -20    | 1  | 3  |
| bol-miR0160-5p | TCTCCAGATGAAGACAAACGA    | 21 | 87  | -22.3  | 1  | 2  |
| bol-miR0161-5p | GTTTCATTAGGCTTTATCCA     | 20 | 77  | -21.4  | 5  | 2  |
| bol-miR0162-5p | ATACGTCTAGTGGAGAACCCGAAC | 24 | 72  | -23.1  | 0  | 3  |
| bol-miR0163-5p | CGTTGTGTGGCTTTTACCGA     | 20 | 87  | -25.8  | 3  | 0  |

|                |                          |    |    |       |    |    |
|----------------|--------------------------|----|----|-------|----|----|
| bol-miR0164-3p | TTTGGATTGGAGGAGGCGCAA    | 21 | 85 | -18.2 | 8  | 11 |
| bol-miR0165-3p | TGTCCAAAAGCAGCCAAAGCA    | 21 | 88 | -28.2 | 17 | 10 |
| bol-miR0166-3p | TTTGAGCTTGGAGGCTACTGC    | 21 | 97 | -21.3 | 4  | 0  |
| bol-miR0167-5p | TGAGAACAATCATTGTATGA     | 20 | 95 | -25.9 | 3  | 3  |
| bol-miR0168-3p | ATTGGATGTTGTTAGTTTCGATT  | 24 | 91 | -21.7 | 1  | 2  |
| bol-miR0169-3p | AACCAGAAGTTCTTTGAGACATTC | 24 | 96 | -20.8 | 4  | 8  |
| bol-miR0170-5p | ACCTGATCCGAAATACCCGAACCC | 24 | 80 | -19.9 | 2  | 1  |
| bol-miR0171-5p | ACCCTAATTTCTTTTGTAATCAAA | 24 | 83 | -22.7 | 3  | 1  |
| bol-miR0172-3p | AAATAGATGCTGTTTTTAGTTCA  | 23 | 97 | -18   | 0  | 3  |
| bol-miR0173-3p | TTGGACTGACGATTTTGGCCAAA  | 24 | 93 | -23.2 | 1  | 2  |
| bol-miR0174-3p | TGGTTTGTGCATTTTAACCGA    | 21 | 97 | -20.8 | 2  | 1  |
| bol-miR0175-3p | ATTCTATTCGTCTGGTGTGTT    | 21 | 91 | -35.2 | 0  | 3  |
| bol-miR0176-3p | ACGGATTTAGACCTGAGTGGTAAC | 24 | 97 | -34.8 | 1  | 5  |
| bol-miR0177-5p | GTTTGTCTGAACAAGGTCAGCA   | 21 | 70 | -20.2 | 3  | 1  |

---

|                        |                          |    |    |        |    |    |
|------------------------|--------------------------|----|----|--------|----|----|
| bol-<br>miR0178-<br>3p | AGAGAATAGGAAATCTATGCAACA | 24 | 99 | -22    | 0  | 8  |
| bol-<br>miR0179-<br>3p | TTAGAACAAAGTTTTATACTGA   | 22 | 99 | -20    | 5  | 1  |
| bol-<br>miR0180-<br>5p | TGTTTTGTGGGATTTAAAGTA    | 21 | 98 | -26.2  | 3  | 0  |
| bol-<br>miR0181-<br>3p | ATAGACTGTGTTACATATCG     | 21 | 72 | -21.8  | 3  | 1  |
| bol-<br>miR0182-<br>5p | AGTAAAAACAACAGAGAATAAAGA | 24 | 99 | -26.7  | 3  | 0  |
| bol-<br>miR0183-<br>5p | GATGAAATGCCTGAACGAAATCTT | 24 | 90 | -22.5  | 5  | 9  |
| bol-<br>miR0184-<br>5p | TTTGTTTTCAATCTGTAGTCC    | 21 | 73 | -19.6  | 0  | 3  |
| bol-<br>miR0185-<br>3p | ATACGTTGTAGTATTGTAAGTGTT | 24 | 99 | -22    | 8  | 11 |
| bol-<br>miR0186-<br>3p | ATAAGATAATAGCAACACTTGAGA | 24 | 97 | -21    | 6  | 9  |
| bol-<br>miR0187-<br>3p | TTTGGATTGGAGGTTTCTCTT    | 21 | 82 | -22.1  | 2  | 3  |
| bol-<br>miR0188-<br>5p | TCCGGATATCCGATTTTTCGGAGC | 24 | 75 | -33.3  | 5  | 3  |
| bol-<br>miR0189-<br>3p | ATTCGGTCAAATGCAAATCTT    | 21 | 98 | -26.71 | 15 | 29 |
| bol-<br>miR0190-<br>3p | TGGAAGATGCAAAGTGTGAGTG   | 22 | 81 | -22    | 2  | 1  |
| bol-<br>miR0191-<br>3p | GTAAAAATACAGAACTCAAATC   | 24 | 90 | -18.6  | 9  | 3  |

---

|                |                           |    |     |        |    |    |
|----------------|---------------------------|----|-----|--------|----|----|
| bol-miR0192-5p | ACAGGTGGTGGAAACAAATATGAGT | 24 | 99  | -47.8  | 3  | 0  |
| bol-miR0193-5p | TGTTGTGCGGGTTCTTGCCGG     | 21 | 98  | -35.9  | 7  | 8  |
| bol-miR0194-5p | ATCCATTTTAAAACTCTTGTA     | 21 | 89  | -21.4  | 3  | 0  |
| bol-miR0195-5p | CTTGCAAGGATAGTAGAAGGT     | 21 | 88  | -22.5  | 25 | 25 |
| bol-miR0196-5p | TGATGTCATCTGGAATCTTCTC    | 22 | 86  | -22.1  | 2  | 2  |
| bol-miR0197-3p | ATTTAGGGTTTAGGGTTTTGATGA  | 24 | 93  | -20.1  | 2  | 1  |
| bol-miR0198-3p | GAGGATAAAATTATAAGAATT     | 21 | 82  | -19.3  | 11 | 9  |
| bol-miR0199-3p | AAGATGATGGGTTTGATCCAATGA  | 24 | 86  | -19.6  | 2  | 4  |
| bol-miR0200-3p | AGAAGCGTTATGGAAGTGAGATTC  | 24 | 101 | -23.6  | 3  | 0  |
| bol-miR0201-5p | GCGAGGGTGATGTTTCAACGT     | 21 | 93  | -25.7  | 4  | 6  |
| bol-miR0202-3p | GCCGAATTGGAACGCAAAATC     | 21 | 87  | -18.11 | 15 | 16 |
| bol-miR0203-5p | CATATTGATTTAGTCTAATCAAC   | 23 | 100 | -19.8  | 3  | 1  |
| bol-miR0204-5p | AACCGGGTTCATGAATTATGGTCA  | 24 | 95  | -18.42 | 7  | 5  |

miR\_seq, miRNA sequence; LM, length of mature miRNA; LP, length of precursor miRNA; MFE, minimum folding free energy
