# Supplementary material
Source: MDPI journal article supplement (https://www.mdpi.com/2311-7524/9/4/515)
Supplement: s1 [file s1]

**Table S1.** The miRNAs primers designed for stem-loop qRT-PCR

| <b>miR NAs</b>  | <b>stem-loop primers (5'-3')</b>                       | <b>forward primers (5'-3')</b>    |
|-----------------|--------------------------------------------------------|-----------------------------------|
| <b>bol-miR1</b> | GTCGTATCCAGTGCAGGGTCCGAGGTATTCGC<br>ACTGGATACGACGTGCTC | ACACTCCAGCTGGGTGA<br>CAGAAGATAG   |
| <b>57a</b>      |                                                        |                                   |
| <b>bol-miR1</b> | GTCGTATCCAGTGCAGGGTCCGAGGTATTCGC<br>ACTGGATACGACCGTGAT | AGGCTCAGCTGTTGAGCC<br>GTGCCAAT    |
| <b>71a</b>      |                                                        |                                   |
| <b>bol-miR1</b> | GTCGTATCCAGTGCAGGGTCCGAGGTATTCGC<br>ACTGGATACGACATGCAG | CGCCGTCCAGCTGGAGAA<br>TCTTGATGATG |
| <b>72</b>       |                                                        |                                   |
| <b>bol-miR3</b> | GTCGTATCCAGTGCAGGGTCCGAGGTATTCGC<br>ACTGGATACGACAAGGGG | ACCGTCCAGCTGGTGTGT<br>TCTCAGGTCA  |
| <b>98a-3p</b>   |                                                        |                                   |
| <b>bol-miR8</b> | GTCGTATCCAGTGCAGGGTCCGAGGTATTCGC<br>ACTGGATACGACTCCCTT | ACCGTCCAGCTGGTAGAC<br>CATTTGTGAG  |
| <b>24</b>       |                                                        |                                   |
| <b>bol-miR0</b> | GTCGTATCCAGTGCAGGGTCCGAGGTATTCGC<br>ACTGGATACGACACAGAG | GTCTCCAGCTGGGCAAGT<br>TGACTTTGG   |
| <b>023</b>      |                                                        |                                   |
| <b>bol-miR0</b> | GTCGTATCCAGTGCAGGGTCCGAGGTATTCGC<br>ACTGGATACGACAAGCCT | TCCAGCTGGCTTGACTAG<br>GACGGTCTG   |
| <b>101</b>      |                                                        |                                   |
| <b>bol-miR0</b> | GTCGTATCCAGTGCAGGGTCCGAGGTATTCGC<br>ACTGGATACGACTCTAGA | AGGCTCAGCTGCCTTCTC<br>ATCGATGG    |
| <b>142</b>      |                                                        |                                   |

Universal reverse primer: GGTCCGAGGTATTCGCACTGGATAC. All sequences are in written in 5'-3'.
